# Supplementary material for: Second-order nonlinear polarizability of ferrocene–BODIPY donor–acceptor adducts. Quantifying charge redistribution in the excited state
Source: Royal Society of Chemistry journal article supplement (doi:10.1039/c6dt04455g), 2016-12-20
Supplement: c6dt04455g1.pdf [file c6dt04455g1.pdf]

## Second-order nonlinear polarizability of ferrocene-BODIPY donor-acceptor adducts. Quantifying charge redistribution in the excited state

Navdeep Kaur,<sup>a</sup> Nick Van Steerteghem<sup>b</sup> Priya Singla<sup>a</sup>, Paramjit Kaur,<sup>\*,a</sup> Koen Clays<sup>b</sup> and Kamaljit Singh<sup>\*,a</sup>

<sup>a</sup>Department of Chemistry, UGC Centre of Advanced Study-II, Guru Nanak Dev University, Amritsar-143005, India. Email: [kamaljit.chem@gndu.ac.in](mailto:kamaljit.chem@gndu.ac.in)

<sup>b</sup>Department of Chemistry, University of Leuven, Celestijnenlaan 200D, B-3001 Leuven, Belgium. E-mail: [Koen.Clays@fys.kuleuven.be](mailto:Koen.Clays@fys.kuleuven.be)

| Sr. No | Content                                                                                   | Page No. |
|--------|-------------------------------------------------------------------------------------------|----------|
| 1      | Table S1. Comparison of first hyperpolarisability $\beta_{HRS}$ ( $\times 10^{-30}$ esu). | 3        |
| 2      | Fig. S1. Optimized structures of <b>7-12</b> .                                            | 4        |
| 3      | Table S2. Cartesian coordinate of optimized structure of <b>7</b> .                       | 5        |
| 4      | Table S3. Cartesian coordinate of optimized structure of <b>8</b> .                       | 6        |
| 5      | Table S4. Cartesian coordinate of optimized structure of <b>9</b> .                       | 7        |
| 6      | Table S5. Cartesian coordinate of optimized structure of <b>10</b> .                      | 9        |
| 7      | Table S6. Cartesian coordinate of optimized structure of <b>11</b> .                      | 11       |
| 8      | Table S7. Cartesian coordinate of optimized structure of <b>12</b> .                      | 13       |
| 9      | Fig. S2. <sup>1</sup> H NMR (CDCl <sub>3</sub> ) spectrum of <b>6</b> .                   | 15       |
| 10     | Fig. S3. <sup>13</sup> C NMR (CDCl <sub>3</sub> ) spectrum of <b>6</b> .                  | 15       |
| 11     | Fig. S4. HRMS spectrum of <b>6</b> .                                                      | 16       |
| 12     | Fig. S5. FTIR spectrum of <b>6</b> .                                                      | 16       |
| 13     | Fig. S6. <sup>1</sup> H NMR (CDCl <sub>3</sub> ) spectrum of <b>8</b> .                   | 17       |
| 14     | Fig. S7. <sup>13</sup> C NMR (CDCl <sub>3</sub> ) spectrum of <b>8</b> .                  | 17       |
| 15     | Fig. S8. HRMS spectrum of <b>8</b> .                                                      | 18       |
| 16     | Fig. S9. FTIR spectrum of <b>8</b> .                                                      | 18       |
| 17     | Fig. S10. <sup>1</sup> H NMR (CDCl <sub>3</sub> ) spectrum of <b>10</b> .                 | 19       |
| 18     | Fig. S11. <sup>13</sup> C NMR (CDCl <sub>3</sub> ) spectrum of <b>10</b> .                | 19       |

|    |                                                                                                                                             |    |
|----|---------------------------------------------------------------------------------------------------------------------------------------------|----|
| 19 | Fig. S12. HRMS spectrum of <b>10</b> .                                                                                                      | 20 |
| 20 | Fig. S13. FTIR spectrum of <b>10</b> .                                                                                                      | 20 |
| 21 | Fig. S14. <sup>1</sup> H NMR (CDCl <sub>3</sub> ) spectrum of <b>11</b> .                                                                   | 21 |
| 22 | Fig. S15. <sup>13</sup> C NMR (CDCl <sub>3</sub> ) spectrum of <b>11</b> .                                                                  | 21 |
| 23 | Fig. S16. HRMS spectrum of <b>11</b> .                                                                                                      | 22 |
| 24 | Fig. S17. FTIR spectrum of <b>11</b> .                                                                                                      | 22 |
| 25 | Fig. S18. <sup>1</sup> H NMR (CDCl <sub>3</sub> ) spectrum of <b>12</b> .                                                                   | 23 |
| 26 | Fig. S19. <sup>13</sup> C NMR (CDCl <sub>3</sub> ) spectrum of <b>12</b> .                                                                  | 23 |
| 27 | Fig. S20. HRMS spectrum of <b>12</b> .                                                                                                      | 24 |
| 28 | Fig. S21. FTIR spectrum of <b>12</b> .                                                                                                      | 24 |
| 29 | Table S8. Crystal data and structure refinement for <b>8</b> .                                                                              | 25 |
| 30 | Table S9. Atomic coordinates ( $\times 10^4$ ) and equivalent isotropic displacement parameters ( $\text{Å}^2 \times 10^3$ ) for <b>8</b> . | 26 |
| 31 | Table S10. Bond lengths [ $\text{Å}$ ] and angles [deg] for <b>8</b> .                                                                      | 27 |
| 32 | Table S11. Anisotropic displacement parameters ( $\text{Å}^2 \times 10^3$ ) for <b>8</b> .                                                  | 33 |
| 33 | Table S12. Hydrogen coordinates ( $\times 10^4$ ) and isotropic displacement parameters ( $\text{Å}^2 \times 10^3$ ) for <b>8</b> .         | 34 |
| 34 | Table S13. Torsion angles [deg] for <b>8</b> .                                                                                              | 34 |
| 35 | Fig. S22. Spectroelectrochemistry of <b>8</b> .                                                                                             | 38 |
| 36 | Table S14. Effect of change of solvent polarity on the low energy absorption band of <b>7</b> and <b>8</b> .                                | 38 |
| 37 | Fig. S23. The estimated Natural Bond Orbital (NBO) charge distribution.                                                                     | 39 |
| 38 | Fig. S24. Color and fluorescence changes of <b>7</b> and <b>8</b> upon reacting with water.                                                 | 39 |
| 39 | Complete reference 71.                                                                                                                      | 40 |

Table S1. Comparison of first hyperpolarisability  $\beta_{HRS}$  ( $\times 10^{-30}$  esu) (Literature vs. current work)

| COMPOUNDS | $\beta^a(\times 10^{-30})$ esu                                              |    |
|-----------|-----------------------------------------------------------------------------|----|
|           | $R_1=R_2=CH_3$                                                              | 25 |
|           | $R_1=$<br>$R_2=CH_3$                                                        | 30 |
|           | $R_1=CH_3$<br>$R_2=$                                                        | 12 |
|           | $R_1=R_2=$                                                                  | 30 |
| <br>(7)   | <b><math>\beta</math> (<math>\times 10^{-30}</math>) esu (present work)</b> |    |
|           | 74                                                                          |    |
| <br>(8)   | 64                                                                          |    |
| <br>(9)   | 20                                                                          |    |
| <br>(10)  | 49                                                                          |    |
| <br>(11)  | 62                                                                          |    |

<sup>a</sup> Shi, W.-J.; Lo, P.-C.; Singh, A.; Ledoux.-Rak, I.; Ng, D.K.P. *Tetrahedron*, 68, **2012**, 8712-8718.

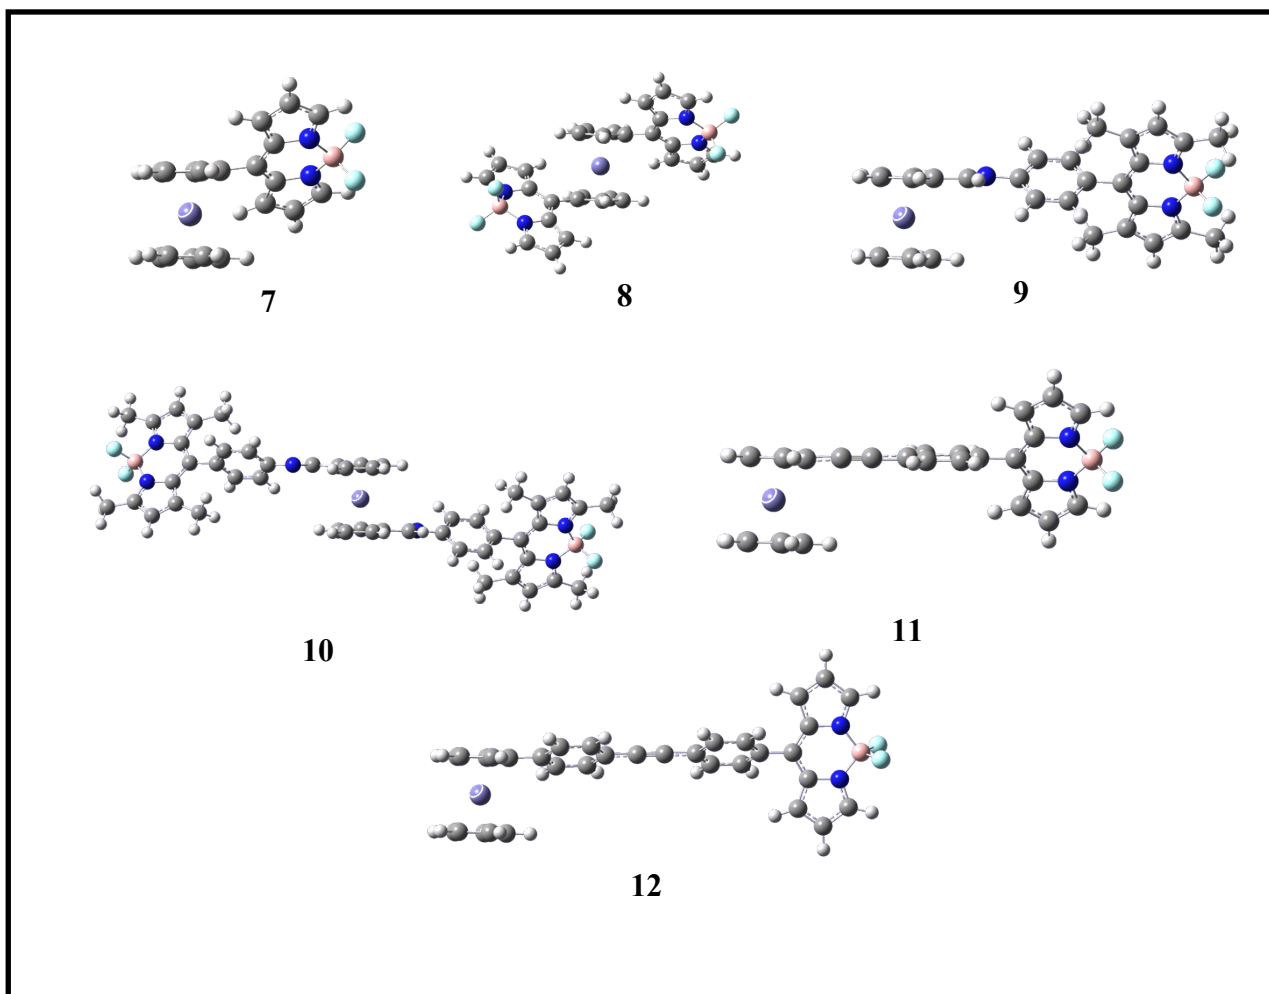

Fig. S1. Optimized structures of 7-12.

Table S2. Cartesian coordinates of optimized structure of **7**.

| Center Number | Atomic Number | Coordinates (Å) |           |           |
|---------------|---------------|-----------------|-----------|-----------|
|               |               | X               | Y         | Z         |
| 1             | 26            | -5.622920       | -0.048728 | 0.281124  |
| 2             | 6             | -4.085472       | 0.282892  | -1.092489 |
| 3             | 6             | -4.841000       | -0.914550 | -1.429398 |
| 4             | 1             | -4.427944       | -1.900525 | -1.565796 |
| 5             | 6             | -6.198055       | -0.534573 | -1.663741 |
| 6             | 1             | -6.996071       | -1.199969 | -1.953227 |
| 7             | 6             | -6.315272       | 0.879004  | -1.448594 |
| 8             | 1             | -7.221238       | 1.458766  | -1.527893 |
| 9             | 6             | -5.027243       | 1.384681  | -1.092444 |
| 10            | 1             | -4.797535       | 2.408201  | -0.845542 |
| 11            | 6             | -4.845674       | -0.341679 | 2.194913  |
| 12            | 1             | -3.796931       | -0.394159 | 2.441994  |
| 13            | 6             | -5.681282       | -1.449301 | 1.827295  |
| 14            | 1             | -5.380828       | -2.483977 | 1.772522  |
| 15            | 6             | -6.998517       | -0.939885 | 1.563882  |
| 16            | 1             | -7.855661       | -1.523112 | 1.265607  |
| 17            | 6             | -6.975202       | 0.480107  | 1.772022  |
| 18            | 1             | -7.811352       | 1.151176  | 1.652482  |
| 19            | 6             | -5.643816       | 0.850672  | 2.161668  |
| 20            | 1             | -5.304215       | 1.848492  | 2.391173  |
| 21            | 6             | -2.633655       | 0.376217  | -0.944919 |
| 22            | 6             | -2.257825       | -1.883930 | 0.267315  |
| 23            | 6             | -1.092331       | -2.529817 | 0.694503  |
| 24            | 1             | -3.266849       | -2.244739 | 0.370851  |
| 25            | 6             | -0.012699       | -1.682279 | 0.386241  |
| 26            | 1             | -1.022902       | -3.492752 | 1.175447  |
| 27            | 1             | 1.040204        | -1.820346 | 0.575789  |
| 28            | 6             | -1.878643       | -0.646552 | -0.318856 |
| 29            | 7             | -0.475167       | -0.555417 | -0.218442 |
| 30            | 6             | -2.396406       | 2.560400  | -2.315364 |
| 31            | 6             | -0.161804       | 2.733468  | -2.043623 |
| 32            | 6             | -1.280936       | 3.334804  | -2.649310 |
| 33            | 1             | -3.408558       | 2.718882  | -2.648106 |
| 34            | 1             | 0.875242        | 3.028180  | -2.080582 |
| 35            | 1             | -1.265583       | 4.218257  | -3.267822 |
| 36            | 6             | -1.949658       | 1.489154  | -1.492314 |
| 37            | 7             | -0.553646       | 1.628845  | -1.355523 |
| 38            | 5             | 0.363551        | 0.681156  | -0.571120 |
| 39            | 9             | 1.506810        | 0.316752  | -1.360278 |
| 40            | 9             | 0.849945        | 1.316596  | 0.629333  |

Table S3. Cartesian coordinates of optimized structure of **8**.

| Center Number | Atomic Number | Coordinates (Å) |           |           |
|---------------|---------------|-----------------|-----------|-----------|
|               |               | X               | Y         | Z         |
| 1             | 26            | 0.267151        | 2.381821  | 0.405596  |
| 2             | 9             | -5.331513       | -2.214818 | -0.798225 |
| 3             | 9             | -3.099052       | -2.612652 | -1.371060 |
| 4             | 9             | 4.345218        | -3.626702 | -0.524821 |
| 5             | 9             | 3.681570        | -2.771575 | 1.543881  |
| 6             | 5             | -4.002552       | -1.737968 | -0.666215 |
| 7             | 5             | 3.709751        | -2.536805 | 0.131918  |
| 8             | 7             | -3.862293       | -0.302414 | -1.223521 |
| 9             | 7             | -3.584798       | -1.650681 | 0.815926  |
| 10            | 7             | 2.270140        | -2.335982 | -0.395817 |
| 11            | 7             | 4.447696        | -1.213525 | -0.174831 |
| 12            | 6             | -4.343561       | 0.146328  | -2.406945 |
| 13            | 1             | -5.014879       | -0.460279 | -2.993882 |
| 14            | 6             | -3.813396       | 1.425083  | -2.677116 |
| 15            | 1             | -4.030052       | 2.028601  | -3.544578 |
| 16            | 6             | -2.964299       | 1.751152  | -1.615540 |
| 17            | 1             | -2.387385       | 2.654071  | -1.505417 |
| 18            | 6             | -3.000053       | 0.672666  | -0.688103 |
| 19            | 6             | -2.405436       | 0.487431  | 0.583841  |
| 20            | 6             | -2.752085       | -0.648136 | 1.345841  |
| 21            | 6             | -2.513880       | -0.981601 | 2.712595  |
| 22            | 1             | -1.945870       | -0.390839 | 3.412484  |
| 23            | 6             | -3.193545       | -2.169527 | 2.980094  |
| 24            | 1             | -3.237425       | -2.695059 | 3.920855  |
| 25            | 6             | -3.840917       | -2.557550 | 1.785539  |
| 26            | 1             | -4.463472       | -3.415728 | 1.586907  |
| 27            | 6             | 1.340159        | -3.304619 | -0.559768 |
| 28            | 1             | 1.607155        | -4.344314 | -0.453448 |
| 29            | 6             | 0.085915        | -2.721106 | -0.849800 |
| 30            | 1             | -0.844218       | -3.232424 | -1.040483 |
| 31            | 6             | 0.272372        | -1.339877 | -0.843350 |
| 32            | 1             | -0.490170       | -0.603425 | -1.025322 |
| 33            | 6             | 1.649363        | -1.082036 | -0.571326 |
| 34            | 6             | 2.409439        | 0.105936  | -0.538679 |
| 35            | 6             | 3.817633        | 0.021061  | -0.404644 |
| 36            | 6             | 4.849175        | 0.987002  | -0.591472 |
| 37            | 1             | 4.702867        | 2.024398  | -0.843920 |
| 38            | 6             | 6.073539        | 0.327069  | -0.461509 |
| 39            | 1             | 7.057262        | 0.758419  | -0.560863 |
| 40            | 6             | 5.788240        | -1.029943 | -0.201997 |
| 41            | 1             | 6.459903        | -1.859610 | -0.048516 |
| 42            | 6             | -1.467881       | 1.460435  | 1.155100  |
| 43            | 6             | -1.600223       | 2.904234  | 1.154966  |
| 44            | 1             | -2.389683       | 3.460860  | 0.676793  |
| 45            | 6             | -0.572422       | 3.447025  | 1.986844  |

|    |   |           |          |           |
|----|---|-----------|----------|-----------|
| 46 | 1 | -0.426672 | 4.493253 | 2.205030  |
| 47 | 6 | 0.221493  | 2.362098 | 2.487426  |
| 48 | 1 | 1.082169  | 2.448840 | 3.131600  |
| 49 | 6 | -0.319172 | 1.143860 | 1.973925  |
| 50 | 1 | 0.073866  | 0.153405 | 2.140134  |
| 51 | 6 | 0.520676  | 3.216677 | -1.493574 |
| 52 | 1 | -0.196039 | 3.790893 | -2.058985 |
| 53 | 6 | 1.488603  | 3.746267 | -0.577589 |
| 54 | 1 | 1.610126  | 4.784576 | -0.311914 |
| 55 | 6 | 2.264989  | 2.655970 | -0.076428 |
| 56 | 1 | 3.061279  | 2.724681 | 0.646301  |
| 57 | 6 | 1.793428  | 1.432979 | -0.689029 |
| 58 | 6 | 0.693113  | 1.799357 | -1.555492 |
| 59 | 1 | 0.140514  | 1.126722 | -2.189895 |

Table S4. Cartesian coordinates of optimized structure of **9**.

| Center Number | Atomic Number | Coordinates (Å) |           |           |
|---------------|---------------|-----------------|-----------|-----------|
|               |               | X               | Y         | Z         |
| 1             | 26            | -6.208677       | 0.109881  | -0.226176 |
| 2             | 6             | -3.343341       | -1.138839 | 0.307330  |
| 3             | 1             | -2.982770       | -1.656340 | -0.593354 |
| 4             | 6             | -4.773155       | -1.187272 | 0.538244  |
| 5             | 6             | -5.500420       | -0.548947 | 1.609818  |
| 6             | 1             | -5.052321       | 0.051165  | 2.384262  |
| 7             | 6             | -6.881033       | -0.892712 | 1.473869  |
| 8             | 1             | -7.678741       | -0.579862 | 2.129190  |
| 9             | 6             | -7.026609       | -1.727834 | 0.313114  |
| 10            | 1             | -7.949531       | -2.151808 | -0.049924 |
| 11            | 6             | -5.732991       | -1.907541 | -0.269386 |
| 12            | 1             | -5.502511       | -2.500901 | -1.141062 |
| 13            | 6             | -5.251969       | 1.591133  | -1.335531 |
| 14            | 1             | -4.187188       | 1.691243  | -1.476699 |
| 15            | 6             | -6.015779       | 2.182107  | -0.275326 |
| 16            | 1             | -5.626687       | 2.805059  | 0.514417  |
| 17            | 6             | -7.389424       | 1.805955  | -0.457583 |
| 18            | 1             | -8.216073       | 2.101255  | 0.169368  |
| 19            | 6             | -7.472703       | 0.982251  | -1.629857 |
| 20            | 1             | -8.372748       | 0.549562  | -2.037764 |
| 21            | 6             | -6.150633       | 0.847626  | -2.172418 |
| 22            | 1             | -5.883062       | 0.298495  | -3.061449 |
| 23            | 6             | -1.148059       | -0.440956 | 0.834697  |
| 24            | 6             | -0.249086       | -0.512038 | 1.915427  |
| 25            | 6             | -0.636605       | -0.218374 | -0.459654 |
| 26            | 6             | 1.124814        | -0.402163 | 1.704737  |
| 27            | 1             | -0.652548       | -0.658879 | 2.910843  |
| 28            | 6             | 0.739412        | -0.093302 | -0.664545 |
| 29            | 1             | -1.317196       | -0.112167 | -1.298281 |
| 30            | 6             | 1.637499        | -0.190884 | 0.411307  |
| 31            | 1             | 1.808309        | -0.469561 | 2.545225  |

|    |   |           |           |           |
|----|---|-----------|-----------|-----------|
| 32 | 1 | 1.122334  | 0.088242  | -1.664078 |
| 33 | 7 | -2.528450 | -0.544309 | 1.117204  |
| 34 | 6 | 3.110146  | -0.057516 | 0.183570  |
| 35 | 6 | 3.179864  | 2.527017  | 0.482657  |
| 36 | 6 | 4.260885  | 3.408739  | 0.400525  |
| 37 | 6 | 5.430343  | 2.670788  | 0.107219  |
| 38 | 1 | 4.219853  | 4.479143  | 0.537860  |
| 39 | 6 | 3.709995  | 1.212524  | 0.231076  |
| 40 | 7 | 5.098155  | 1.355910  | 0.007105  |
| 41 | 6 | 3.532226  | -2.598234 | -0.188032 |
| 42 | 6 | 5.775109  | -2.338102 | -0.545727 |
| 43 | 6 | 4.720289  | -3.276349 | -0.473911 |
| 44 | 1 | 4.825283  | -4.341489 | -0.618088 |
| 45 | 6 | 3.877101  | -1.204915 | -0.082457 |
| 46 | 7 | 5.267710  | -1.098440 | -0.310665 |
| 47 | 5 | 6.079527  | 0.209972  | -0.300824 |
| 48 | 9 | 7.110243  | 0.151099  | 0.702211  |
| 49 | 9 | 6.706665  | 0.419146  | -1.579521 |
| 50 | 6 | 2.193221  | -3.257845 | -0.033369 |
| 51 | 6 | 7.220959  | -2.575225 | -0.826215 |
| 52 | 6 | 1.768157  | 2.938800  | 0.781422  |
| 53 | 6 | 6.825994  | 3.163294  | -0.079149 |
| 54 | 1 | 7.837171  | -2.217341 | 0.005776  |
| 55 | 1 | 7.413403  | -3.638468 | -0.986808 |
| 56 | 1 | 7.537512  | -2.012330 | -1.711145 |
| 57 | 1 | 1.770169  | -3.105935 | 0.965899  |
| 58 | 1 | 1.456651  | -2.871535 | -0.746375 |
| 59 | 1 | 2.289281  | -4.335551 | -0.197381 |
| 60 | 1 | 1.722712  | 4.020590  | 0.940062  |
| 61 | 1 | 1.082341  | 2.689086  | -0.035784 |
| 62 | 1 | 1.375439  | 2.449269  | 1.679126  |
| 63 | 1 | 7.502037  | 2.678121  | 0.633116  |
| 64 | 1 | 7.192973  | 2.906524  | -1.078973 |
| 65 | 1 | 6.874579  | 4.246202  | 0.055899  |



Table S5. Cartesian coordinates of optimized structure of **10**.

| Center<br>Number | Atomic<br>Number | Coordinates (Å) |           |           |
|------------------|------------------|-----------------|-----------|-----------|
|                  |                  | X               | Y         | Z         |
| 1                | 26               | -0.028721       | -2.147570 | -0.672871 |
| 2                | 6                | -2.767436       | -1.599805 | 0.844748  |
| 3                | 1                | -2.782086       | -0.595418 | 1.291025  |
| 4                | 6                | -1.478654       | -2.265012 | 0.815512  |
| 5                | 6                | -1.195570       | -3.575277 | 0.280215  |
| 6                | 1                | -1.925815       | -4.221995 | -0.177189 |
| 7                | 6                | 0.187661        | -3.856403 | 0.505591  |
| 8                | 1                | 0.701445        | -4.765033 | 0.233409  |
| 9                | 6                | 0.776186        | -2.721978 | 1.163141  |
| 10               | 1                | 1.808420        | -2.626734 | 1.461463  |
| 11               | 6                | -0.243102       | -1.737926 | 1.351263  |
| 12               | 1                | -0.121714       | -0.779100 | 1.831431  |
| 13               | 6                | -0.752027       | -0.903399 | -2.186278 |
| 14               | 1                | -1.707819       | -0.403281 | -2.195634 |
| 15               | 6                | -0.493039       | -2.218495 | -2.702068 |
| 16               | 1                | -1.215673       | -2.868379 | -3.169162 |
| 17               | 6                | 0.892135        | -2.509382 | -2.494134 |
| 18               | 1                | 1.405991        | -3.411319 | -2.789957 |
| 19               | 6                | 1.500683        | -1.365328 | -1.852738 |
| 20               | 6                | 0.465803        | -0.379603 | -1.652302 |
| 21               | 1                | 0.619399        | 0.589892  | -1.208131 |
| 22               | 6                | -5.084037       | -1.485999 | 0.376393  |
| 23               | 6                | -6.246171       | -2.253353 | 0.578565  |
| 24               | 6                | -5.216927       | -0.107394 | 0.116498  |
| 25               | 6                | -7.504993       | -1.654061 | 0.560098  |
| 26               | 1                | -6.135148       | -3.317376 | 0.753605  |
| 27               | 6                | -6.480566       | 0.486905  | 0.085398  |
| 28               | 1                | -4.336416       | 0.492346  | -0.090494 |
| 29               | 6                | -7.638720       | -0.275363 | 0.313246  |
| 30               | 1                | -8.393143       | -2.254799 | 0.728230  |
| 31               | 1                | -6.573294       | 1.548088  | -0.123936 |
| 32               | 7                | -3.842748       | -2.162335 | 0.398404  |
| 33               | 6                | -8.989746       | 0.366913  | 0.279927  |
| 34               | 6                | -9.380973       | -0.002058 | -2.266667 |
| 35               | 6                | -10.471693      | 0.351897  | -3.065077 |
| 36               | 6                | -11.436614      | 0.998219  | -2.259021 |
| 37               | 1                | -10.570911      | 0.165839  | -4.124237 |
| 38               | 6                | -9.693629       | 0.443624  | -0.934026 |
| 39               | 7                | -10.968580      | 1.051545  | -0.983386 |
| 40               | 6                | -9.052012       | 0.942254  | 2.817548  |
| 41               | 6                | -11.118005      | 1.914966  | 2.710085  |

|    |   |            |           |           |
|----|---|------------|-----------|-----------|
| 42 | 6 | -10.044142 | 1.580281  | 3.566559  |
| 43 | 1 | -10.006101 | 1.788273  | 4.625601  |
| 44 | 6 | -9.539097  | 0.887312  | 1.464116  |
| 45 | 7 | -10.812900 | 1.499236  | 1.451794  |
| 46 | 5 | -11.710070 | 1.676919  | 0.212659  |
| 47 | 9 | -12.975905 | 1.022894  | 0.414200  |
| 48 | 9 | -11.957775 | 3.074401  | -0.028110 |
| 49 | 6 | 2.906557   | -1.233120 | -1.521881 |
| 50 | 1 | 3.542227   | -2.097048 | -1.763144 |
| 51 | 6 | 4.777631   | -0.008627 | -0.752699 |
| 52 | 6 | 5.179846   | 0.700126  | 0.394611  |
| 53 | 6 | 5.764329   | -0.476641 | -1.643476 |
| 54 | 6 | 6.532591   | 0.903667  | 0.665106  |
| 55 | 1 | 4.413273   | 1.081368  | 1.059704  |
| 56 | 6 | 7.117518   | -0.257778 | -1.376250 |
| 57 | 1 | 5.470706   | -0.976912 | -2.560474 |
| 58 | 6 | 7.519566   | 0.427953  | -0.217620 |
| 59 | 1 | 6.830633   | 1.444955  | 1.557399  |
| 60 | 1 | 7.869627   | -0.610857 | -2.074904 |
| 61 | 7 | 3.391615   | -0.164520 | -0.979309 |
| 62 | 6 | 8.971091   | 0.665676  | 0.057020  |
| 63 | 6 | 9.098908   | 2.929287  | -1.221631 |
| 64 | 6 | 10.185275  | 3.785624  | -1.417788 |
| 65 | 6 | 11.321908  | 3.234086  | -0.783081 |
| 66 | 1 | 10.169488  | 4.717442  | -1.963408 |
| 67 | 6 | 9.591605   | 1.823003  | -0.442616 |
| 68 | 7 | 10.963900  | 2.059220  | -0.199620 |
| 69 | 6 | 9.325531   | -1.516933 | 1.429294  |
| 70 | 6 | 11.544067  | -1.112802 | 1.803340  |
| 71 | 6 | 10.480995  | -2.014762 | 2.037449  |
| 72 | 1 | 10.559196  | -2.935118 | 2.597000  |
| 73 | 6 | 9.698853   | -0.274228 | 0.807000  |
| 74 | 7 | 11.072858  | -0.071276 | 1.066637  |
| 75 | 5 | 11.906928  | 1.132682  | 0.590239  |
| 76 | 9 | 12.466207  | 1.830466  | 1.717337  |
| 77 | 9 | 12.989879  | 0.689468  | -0.248630 |
| 78 | 6 | 7.716142   | 3.176793  | -1.749371 |
| 79 | 1 | 7.387326   | 2.387469  | -2.434428 |
| 80 | 1 | 6.969522   | 3.227032  | -0.949360 |
| 81 | 1 | 7.691029   | 4.125878  | -2.293390 |
| 82 | 6 | 12.709656  | 3.776642  | -0.713038 |
| 83 | 1 | 12.998423  | 3.961974  | -0.327571 |
| 84 | 1 | 13.425542  | 3.048073  | -1.108282 |
| 85 | 1 | 12.789079  | 4.707103  | -1.279714 |
| 86 | 6 | 7.987640   | -2.195918 | 1.460323  |

|     |   |            |           |           |
|-----|---|------------|-----------|-----------|
| 87  | 1 | 7.221989   | -1.577977 | 1.942578  |
| 88  | 1 | 7.617030   | -2.426133 | 0.455331  |
| 89  | 1 | 8.060874   | -3.135679 | 2.016340  |
| 90  | 6 | 12.965060  | -1.205166 | 2.247405  |
| 91  | 1 | 13.638527  | -1.191531 | 1.383528  |
| 92  | 1 | 13.231868  | -0.338584 | 2.862121  |
| 93  | 1 | 13.131541  | -2.119876 | 2.820863  |
| 94  | 6 | -12.762714 | 1.556130  | -2.652986 |
| 95  | 1 | -13.565943 | 1.073557  | -2.085609 |
| 96  | 1 | -12.814813 | 2.624538  | -2.416709 |
| 97  | 1 | -12.939285 | 1.413547  | -3.721504 |
| 98  | 6 | -8.156417  | -0.710534 | -2.767060 |
| 99  | 1 | -7.245148  | -0.122366 | -2.612050 |
| 100 | 1 | -7.998425  | -1.670555 | -2.263353 |
| 101 | 1 | -8.252868  | -0.905270 | -3.839552 |
| 102 | 6 | -7.754803  | 0.438605  | 3.379221  |
| 103 | 1 | -7.635749  | -0.641841 | 3.242101  |
| 104 | 1 | -6.887591  | 0.911657  | 2.905180  |
| 105 | 1 | -7.708375  | 0.648670  | 4.452151  |
| 106 | 6 | -12.399852 | 2.602601  | 3.040192  |
| 107 | 1 | -12.517708 | 3.505255  | 2.431099  |
| 108 | 1 | -13.253242 | 1.956821  | 2.805782  |
| 109 | 1 | -12.431905 | 2.872761  | 4.098108  |

Table S6. Cartesian coordinates of optimized structure of **11**.

| Center Number | Atomic Number | Coordinates (Å) |           |           |
|---------------|---------------|-----------------|-----------|-----------|
|               |               | X               | Y         | Z         |
| 1             | 26            | 5.927127        | 0.106089  | 0.108301  |
| 2             | 6             | 3.021590        | -0.913276 | -0.639159 |
| 3             | 6             | 4.425692        | -1.049726 | -0.730799 |
| 4             | 6             | 5.276568        | -0.496326 | -1.765816 |
| 5             | 1             | 4.942131        | 0.138790  | -2.570870 |
| 6             | 6             | 6.609177        | -0.961955 | -1.542573 |
| 7             | 1             | 7.470541        | -0.726790 | -2.147939 |
| 8             | 6             | 6.604089        | -1.800926 | -0.377660 |
| 9             | 1             | 7.460606        | -2.305062 | 0.041804  |
| 10            | 6             | 5.268435        | -1.858938 | 0.127706  |
| 11            | 1             | 4.926960        | -2.419639 | 0.983473  |
| 12            | 6             | 5.023800        | 1.638033  | 1.188948  |
| 13            | 1             | 3.960517        | 1.795868  | 1.280590  |
| 14            | 6             | 5.872607        | 2.186590  | 0.170633  |
| 15            | 1             | 5.562770        | 2.842643  | -0.627511 |
| 16            | 6             | 7.209175        | 1.719405  | 0.408916  |

|    |   |           |           |           |
|----|---|-----------|-----------|-----------|
| 17 | 1 | 8.080976  | 1.965476  | -0.176831 |
| 18 | 6 | 7.185005  | 0.882111  | 1.574168  |
| 19 | 1 | 8.035457  | 0.388795  | 2.018013  |
| 20 | 6 | 5.833673  | 0.831981  | 2.056579  |
| 21 | 1 | 5.489673  | 0.292250  | 2.924738  |
| 22 | 6 | 0.403098  | -0.610560 | -0.436480 |
| 23 | 6 | -0.324918 | 0.094717  | -1.422638 |
| 24 | 6 | -0.305714 | -1.142670 | 0.665413  |
| 25 | 6 | -1.700445 | 0.270033  | -1.303670 |
| 26 | 1 | 0.201407  | 0.496320  | -2.281269 |
| 27 | 6 | -1.683238 | -0.976575 | 0.774052  |
| 28 | 1 | 0.238897  | -1.677872 | 1.435179  |
| 29 | 6 | -2.406748 | -0.262400 | -0.204399 |
| 30 | 1 | -2.243649 | 0.797342  | -2.079849 |
| 31 | 1 | -2.205203 | -1.372137 | 1.638158  |
| 32 | 6 | -3.869245 | -0.072955 | -0.077175 |
| 33 | 6 | -3.831029 | 2.492598  | -0.392033 |
| 34 | 6 | -4.858505 | 3.436996  | -0.415453 |
| 35 | 1 | -2.772960 | 2.682198  | -0.477177 |
| 36 | 6 | -6.070581 | 2.736889  | -0.229121 |
| 37 | 1 | -4.759050 | 4.503971  | -0.538809 |
| 38 | 1 | -7.079017 | 3.114894  | -0.170259 |
| 39 | 6 | -4.430260 | 1.213112  | -0.206232 |
| 40 | 7 | -5.818941 | 1.412954  | -0.101692 |
| 41 | 6 | -4.430954 | -2.571076 | 0.275647  |
| 42 | 6 | -6.651487 | -2.233873 | 0.516252  |
| 43 | 6 | -5.644523 | -3.223806 | 0.497287  |
| 44 | 1 | -3.458253 | -3.025210 | 0.174073  |
| 45 | 1 | -7.716998 | -2.342108 | 0.644208  |
| 46 | 1 | -5.800369 | -4.284160 | 0.619306  |
| 47 | 6 | -4.707415 | -1.176680 | 0.175797  |
| 48 | 7 | -6.097253 | -1.014202 | 0.322639  |
| 49 | 5 | -6.876230 | 0.320542  | 0.201354  |
| 50 | 9 | -7.828758 | 0.236163  | -0.857365 |
| 51 | 9 | -7.552021 | 0.620262  | 1.421872  |
| 52 | 6 | 1.812452  | -0.771670 | -0.544660 |

Table S7. Cartesian coordinates of optimized structure of **12**.

| Center Number | Atomic Number | Coordinates (Å) |           |           |
|---------------|---------------|-----------------|-----------|-----------|
|               |               | X               | Y         | Z         |
| 1             | 26            | -7.967390       | 0.305360  | -0.096932 |
| 2             | 6             | -6.505747       | -1.136445 | 0.290393  |
| 3             | 6             | -7.368006       | -0.952336 | 1.436247  |
| 4             | 1             | -7.048476       | -0.677794 | 2.429092  |
| 5             | 6             | -8.711776       | -1.259565 | 1.048331  |
| 6             | 1             | -9.577379       | -1.233878 | 1.691430  |
| 7             | 6             | -8.701496       | -1.624728 | -0.338631 |
| 8             | 1             | -9.559541       | -1.913402 | -0.925167 |
| 9             | 6             | -7.350948       | -1.544152 | -0.807920 |
| 10            | 1             | -7.023506       | -1.754340 | -1.813935 |
| 11            | 6             | -7.003356       | 2.092231  | -0.551687 |
| 12            | 1             | -5.935326       | 2.243267  | -0.571577 |
| 13            | 6             | -7.859618       | 2.268252  | 0.586567  |
| 14            | 1             | -7.551571       | 2.591806  | 1.568506  |
| 15            | 6             | -9.202295       | 1.957623  | 0.183917  |
| 16            | 1             | -10.079220      | 2.004472  | 0.810325  |
| 17            | 6             | -9.175123       | 1.590239  | -1.203217 |
| 18            | 1             | -10.028153      | 1.312620  | -1.802346 |
| 19            | 6             | -7.815972       | 1.673912  | -1.657810 |
| 20            | 1             | -7.467456       | 1.468141  | -2.657672 |
| 21            | 6             | 1.844793        | -0.394716 | 0.133768  |
| 22            | 6             | 2.519889        | 0.424209  | 1.068353  |
| 23            | 6             | 2.613192        | -1.072854 | -0.840616 |
| 24            | 6             | 3.903570        | 0.566302  | 1.021859  |
| 25            | 1             | 1.946020        | 0.940670  | 1.829568  |
| 26            | 6             | 3.998152        | -0.939403 | -0.874874 |
| 27            | 1             | 2.109402        | -1.696720 | -1.570328 |
| 28            | 6             | 4.669405        | -0.113808 | 0.051525  |
| 29            | 1             | 4.405163        | 1.184081  | 1.758290  |
| 30            | 1             | 4.568145        | -1.450214 | -1.642816 |
| 31            | 6             | 6.141418        | 0.037559  | 0.003856  |
| 32            | 6             | 6.138148        | 2.621924  | -0.042303 |
| 33            | 6             | 7.182274        | 3.547467  | -0.074976 |
| 34            | 1             | 5.081130        | 2.834298  | -0.060169 |
| 35            | 6             | 8.388638        | 2.813224  | -0.075577 |
| 36            | 1             | 7.098307        | 4.622390  | -0.106710 |
| 37            | 1             | 9.406865        | 3.167003  | -0.112824 |
| 38            | 6             | 6.720423        | 1.321686  | -0.006900 |
| 39            | 7             | 8.117178        | 1.487701  | -0.037622 |
| 40            | 6             | 6.668971        | -2.492137 | 0.046712  |
| 41            | 6             | 8.908298        | -2.220249 | -0.072876 |

|    |   |           |           |           |
|----|---|-----------|-----------|-----------|
| 42 | 6 | 7.880073  | -3.184805 | 0.010768  |
| 43 | 1 | 5.681231  | -2.915096 | 0.137805  |
| 44 | 1 | 9.977482  | -2.358836 | -0.104779 |
| 45 | 1 | 8.019956  | -4.253581 | 0.051730  |
| 46 | 6 | 6.969623  | -1.101278 | -0.030727 |
| 47 | 7 | 8.369688  | -0.978657 | -0.095449 |
| 48 | 5 | 9.167808  | 0.350263  | -0.114119 |
| 49 | 9 | 10.051092 | 0.406577  | 1.004716  |
| 50 | 9 | 9.923786  | 0.464070  | -1.319126 |
| 51 | 6 | 0.429124  | -0.529333 | 0.170145  |
| 52 | 6 | -2.204672 | -0.765334 | 0.223775  |
| 53 | 6 | -2.971443 | -0.132756 | 1.229402  |
| 54 | 6 | -2.885148 | -1.523712 | -0.754768 |
| 55 | 6 | -4.356999 | -0.250337 | 1.245878  |
| 56 | 1 | -2.465994 | 0.453435  | 1.989286  |
| 57 | 6 | -4.271938 | -1.639833 | -0.727571 |
| 58 | 1 | -2.313058 | -2.023570 | -1.528922 |
| 59 | 6 | -5.041931 | -1.004034 | 0.268334  |
| 60 | 1 | -4.920905 | 0.258149  | 2.020585  |
| 61 | 1 | -4.766920 | -2.247853 | -1.476726 |
| 62 | 6 | -0.787029 | -0.640289 | 0.197186  |

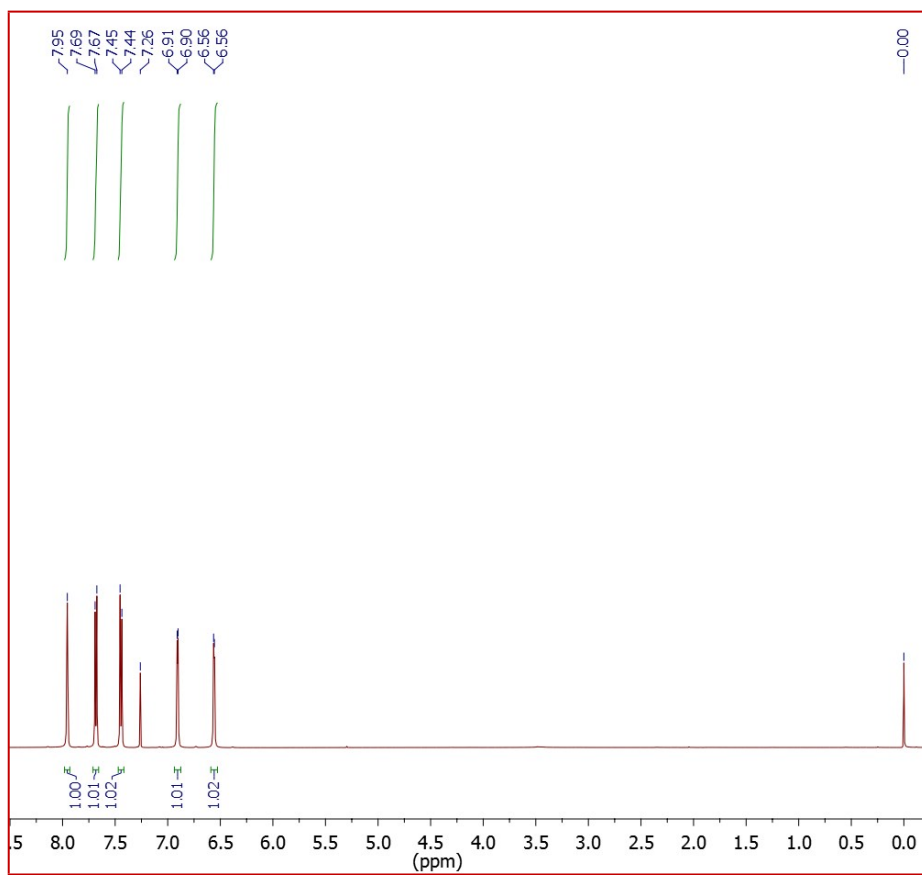

Fig. S2. <sup>1</sup>H NMR (CDCl<sub>3</sub>) spectrum of **6**.

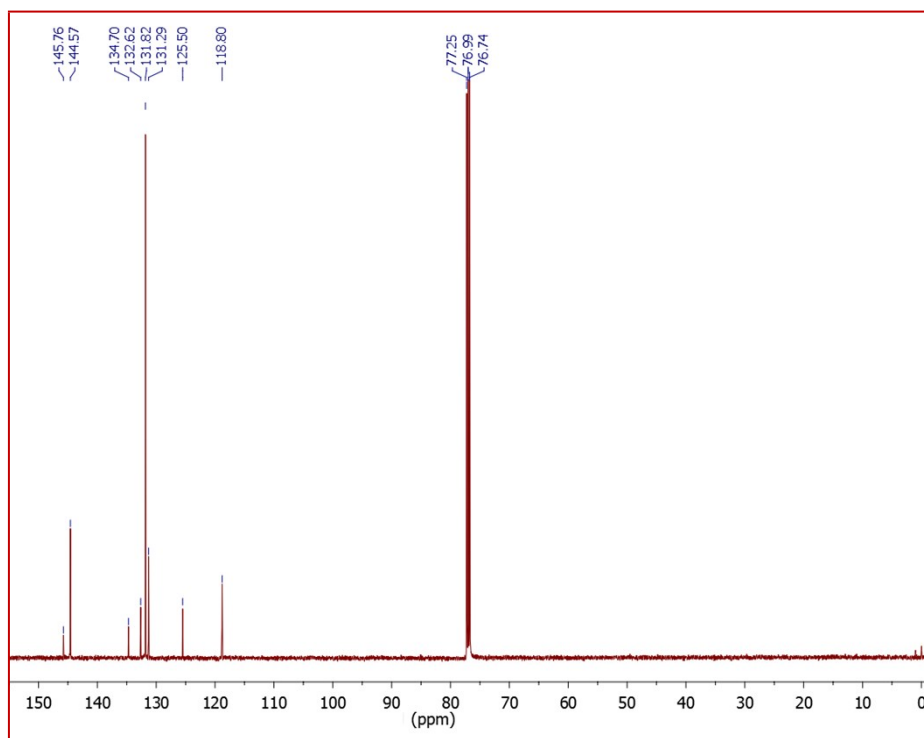

Fig. S3. <sup>13</sup>C NMR (CDCl<sub>3</sub>) spectrum of **6**.

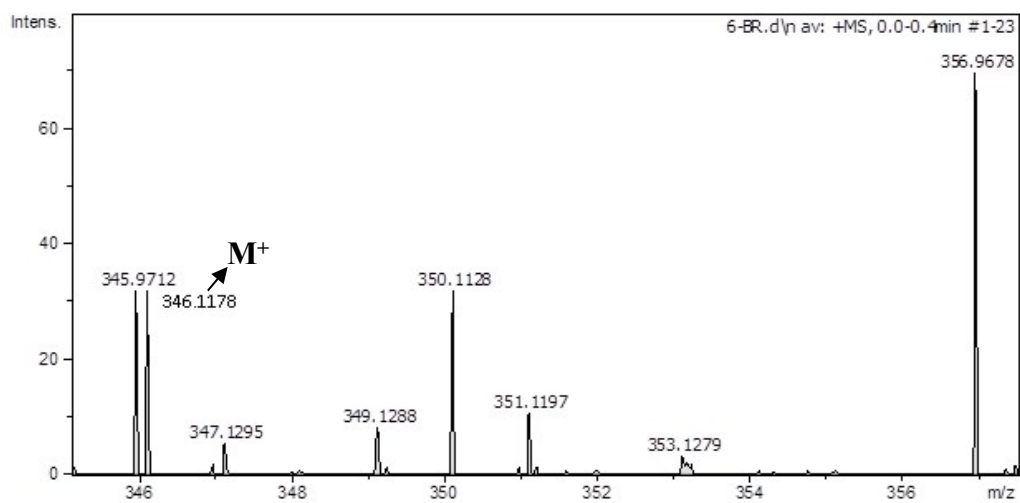

Fig. S4. HRMS spectrum of **6**.

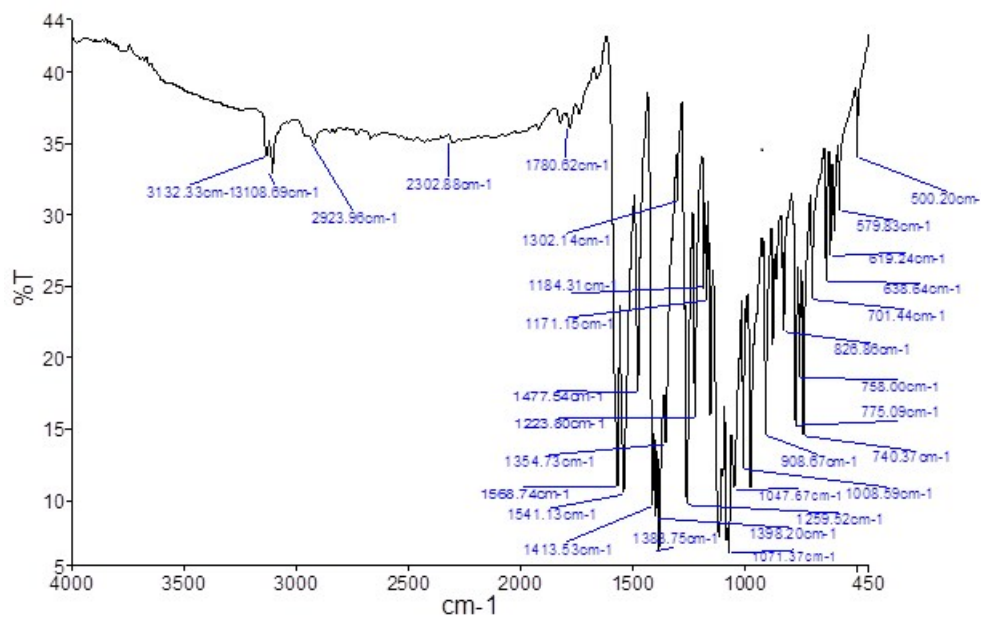

Fig. S5. FTIR spectrum of **6**.



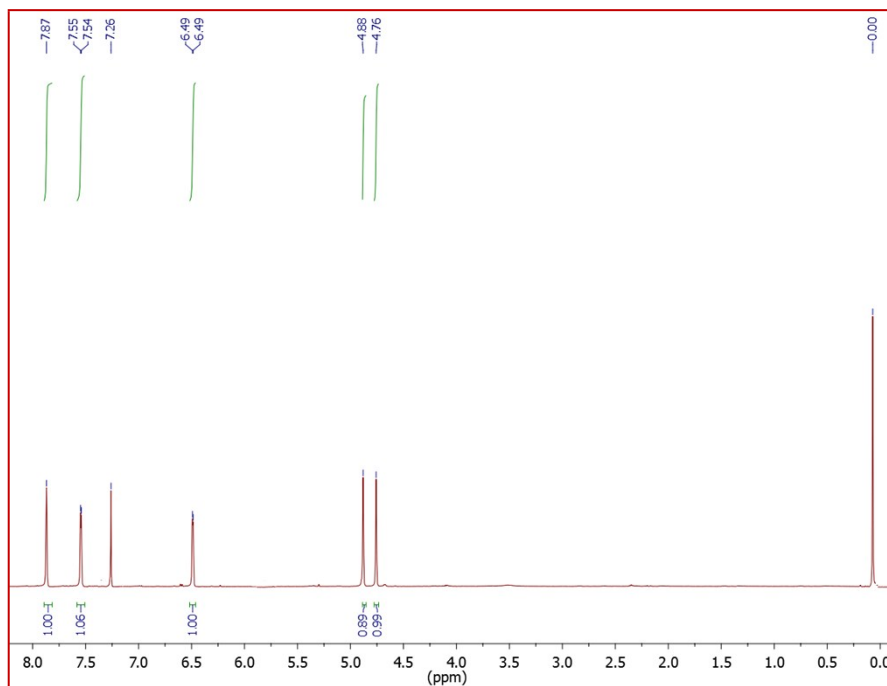

Fig. S6.  $^1\text{H}$  NMR ( $\text{CDCl}_3$ ) spectrum of **8**.

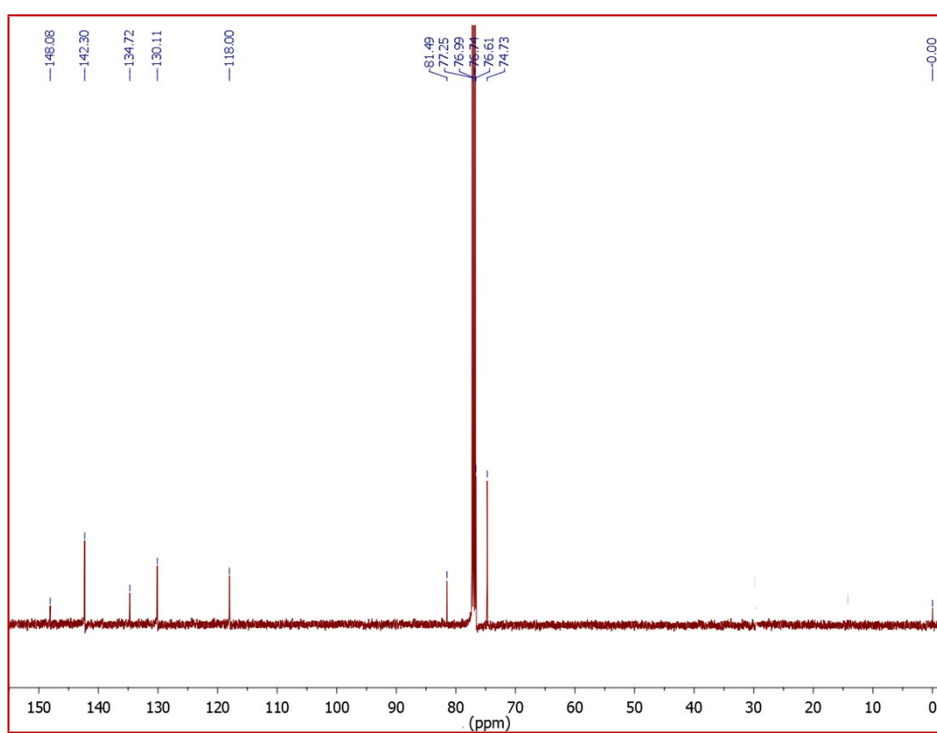

Fig. S7.  $^{13}\text{C}$  NMR ( $\text{CDCl}_3$ ) spectrum of **8**.

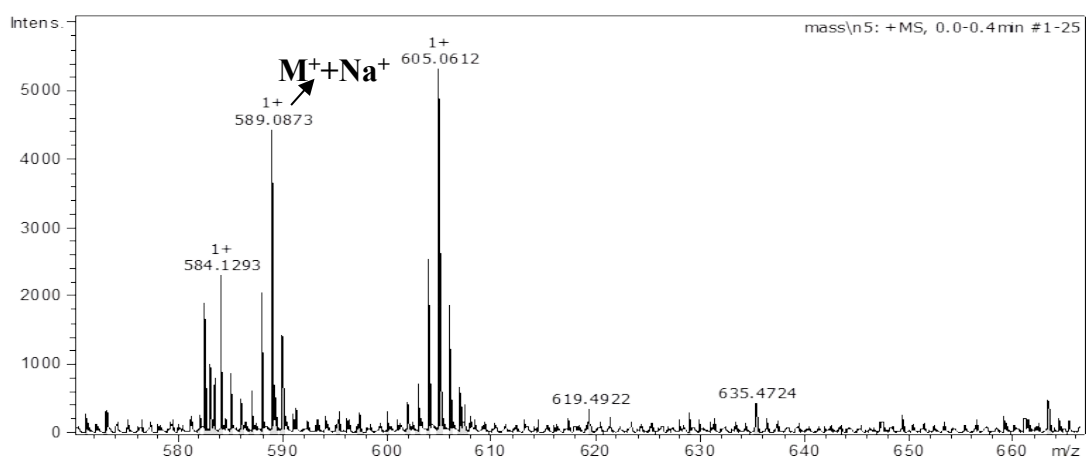

Fig. S8. HRMS spectrum of **8**.

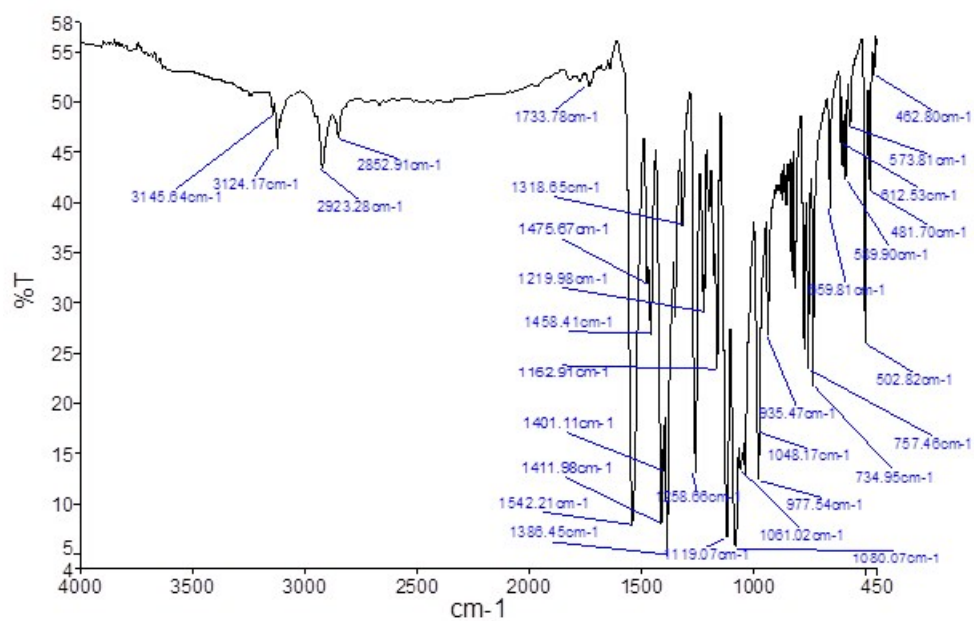

Fig. S9. FTIR spectrum of **8**.

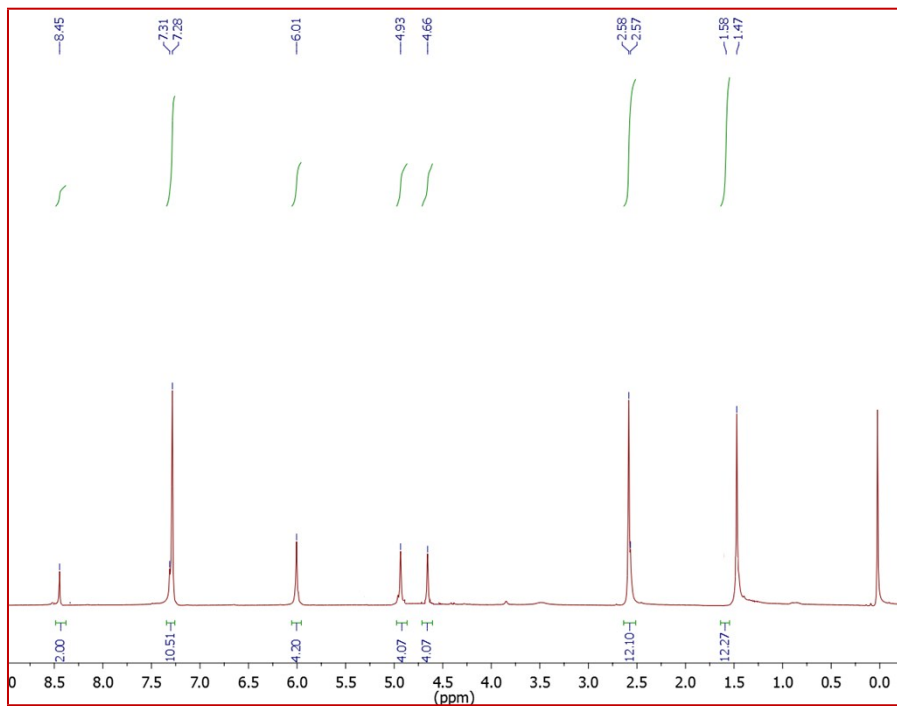

Fig. S10.  $^1\text{H}$  NMR ( $\text{CDCl}_3$ ) spectrum of **10**.

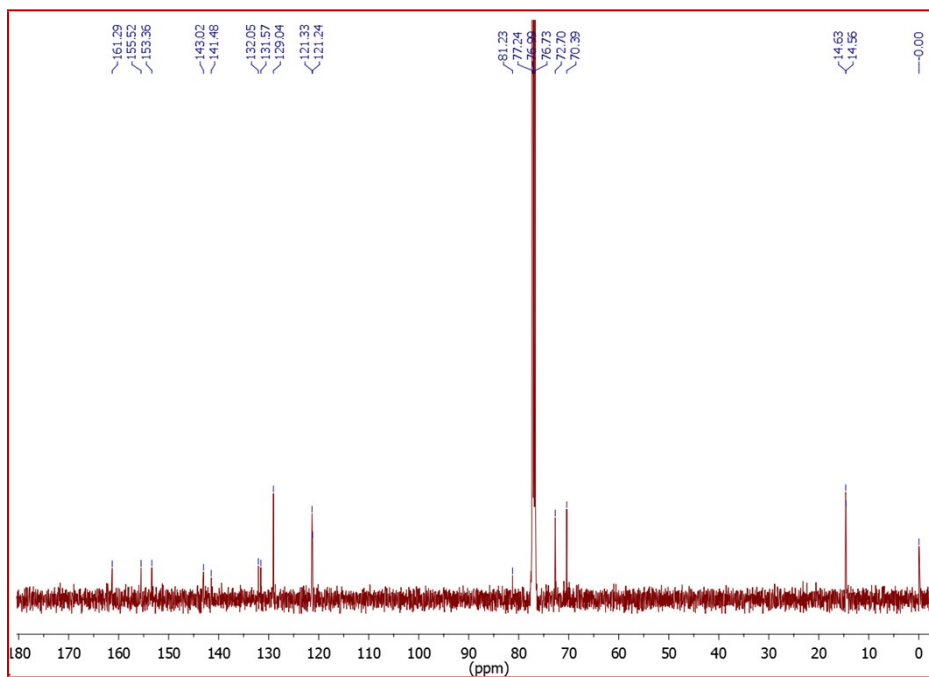

Fig. S11.  $^{13}\text{C}$  NMR ( $\text{CDCl}_3$ ) spectrum of **10**.

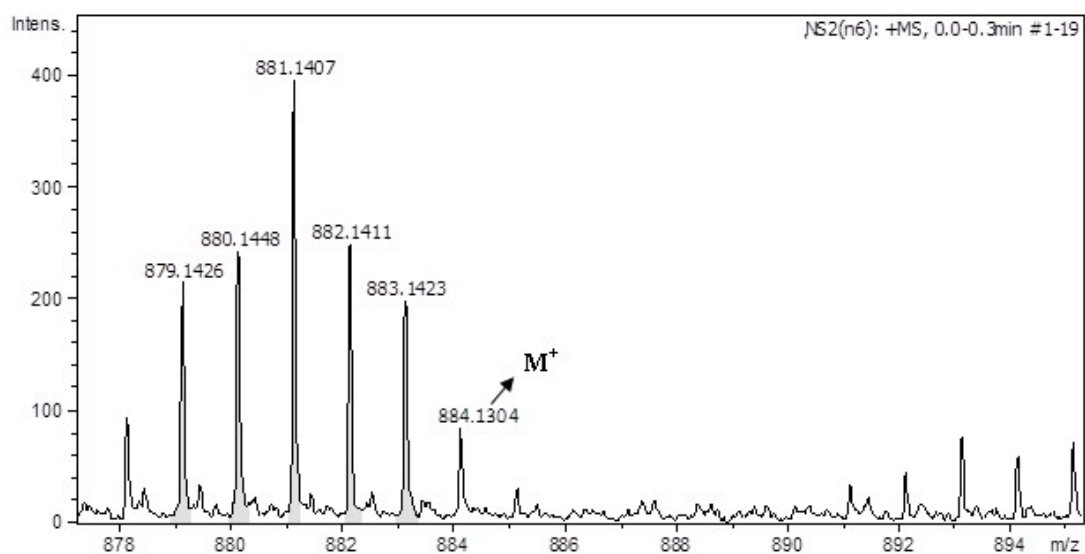

Fig. S12. HRMS spectrum of **10**.

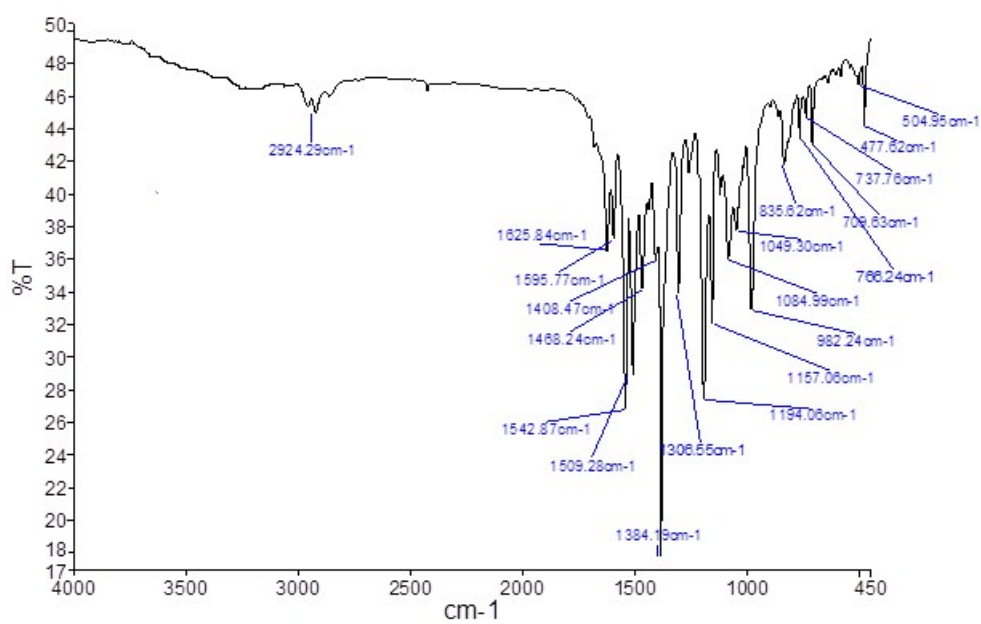

Fig. S13. FTIR spectrum of **10**.

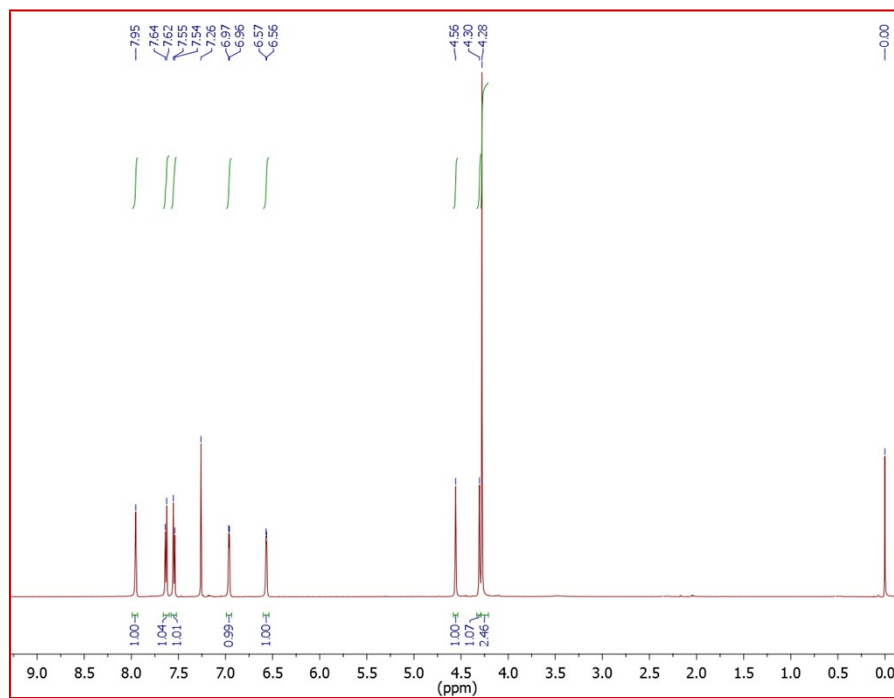

Fig. S14.  $^1\text{H}$  NMR ( $\text{CDCl}_3$ ) spectrum of **11**.

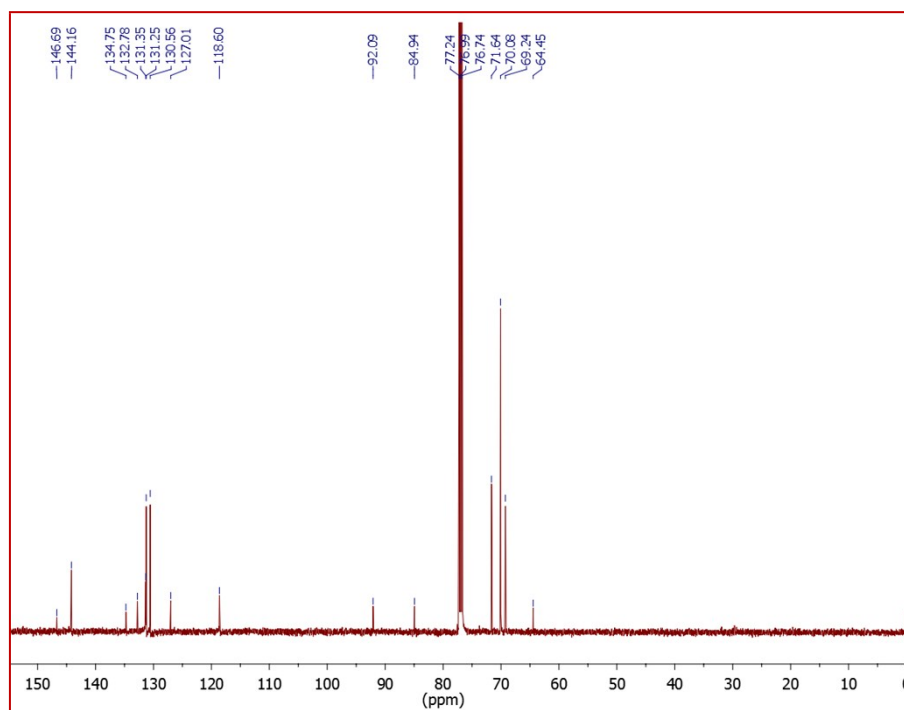

Fig. S15.  $^{13}\text{C}$  NMR ( $\text{CDCl}_3$ ) spectrum of **11**.

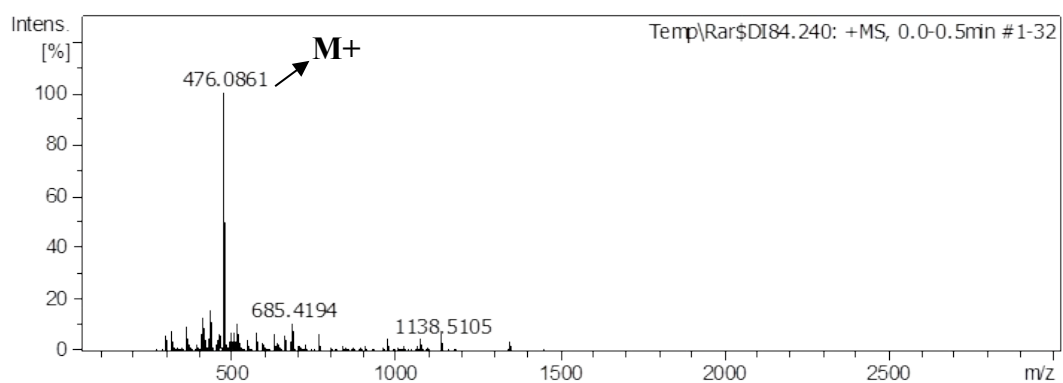

Fig. S16. HRMS spectrum of **11**.

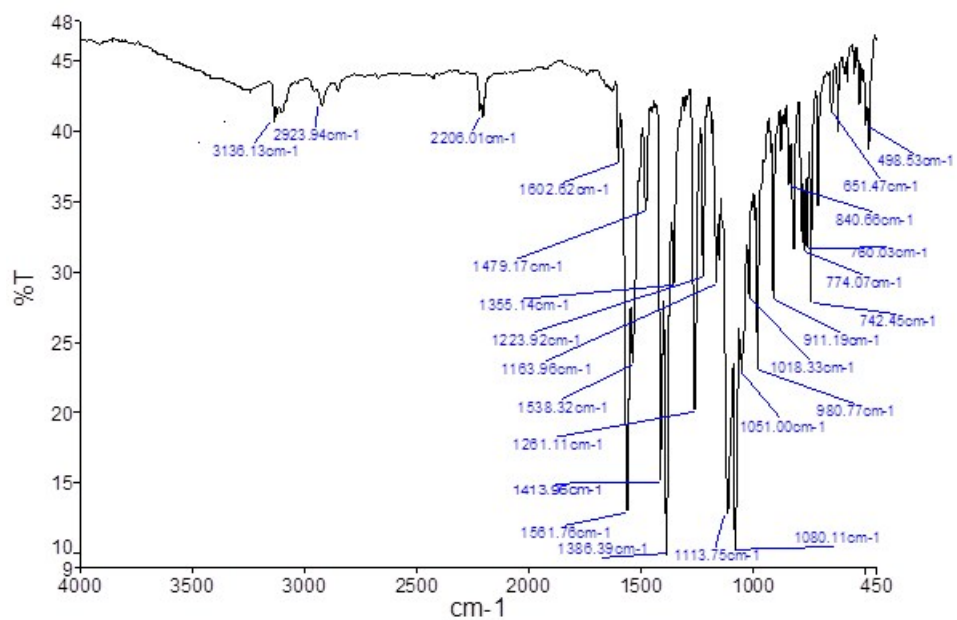

Fig. S17. FTIR spectrum of **11**.

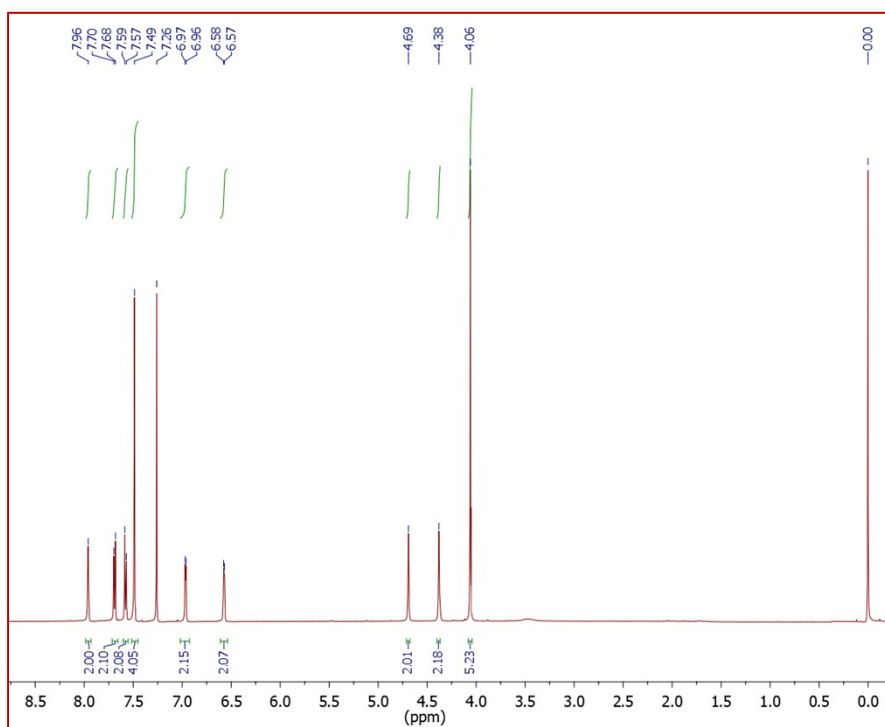

Fig. S18.  $^1\text{H}$  NMR ( $\text{CDCl}_3$ ) spectrum of **12**.

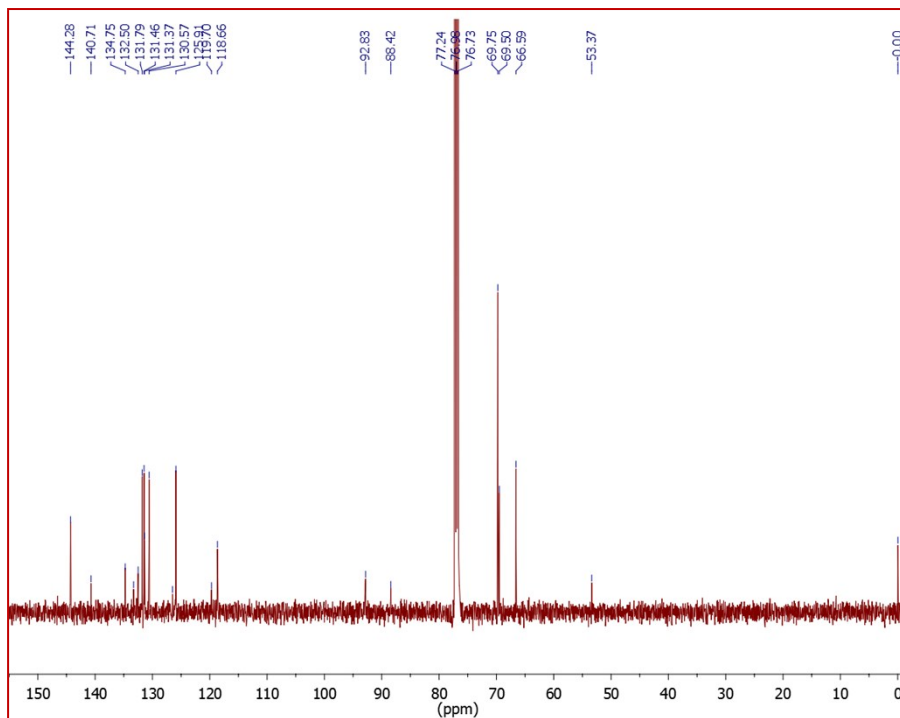

Fig. S19.  $^{13}\text{C}$  NMR ( $\text{CDCl}_3$ ) spectrum of **12**.

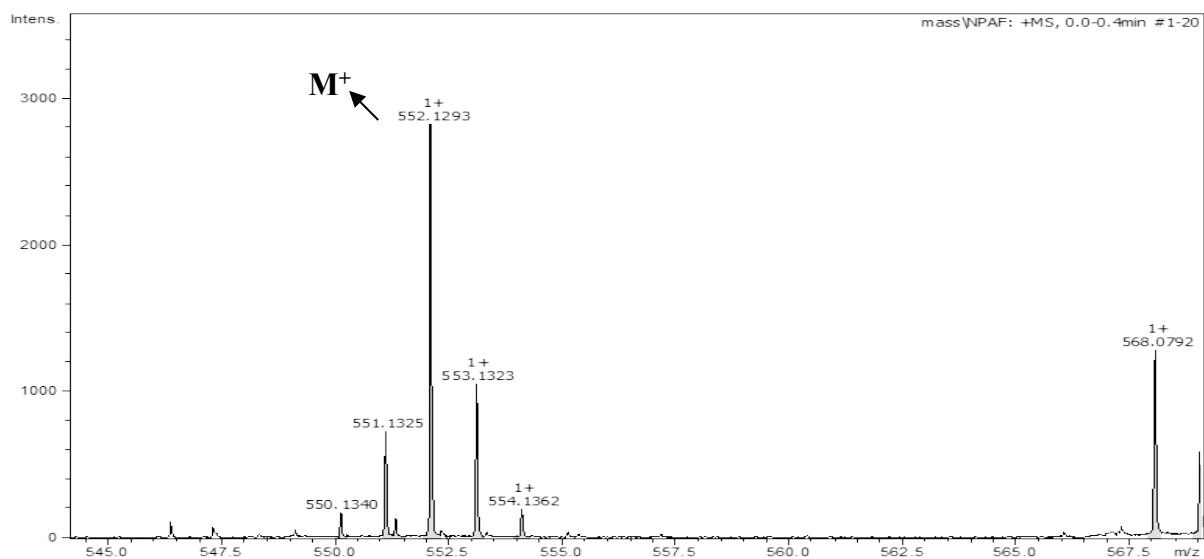

Fig. S20. HRMS spectrum of **12**.

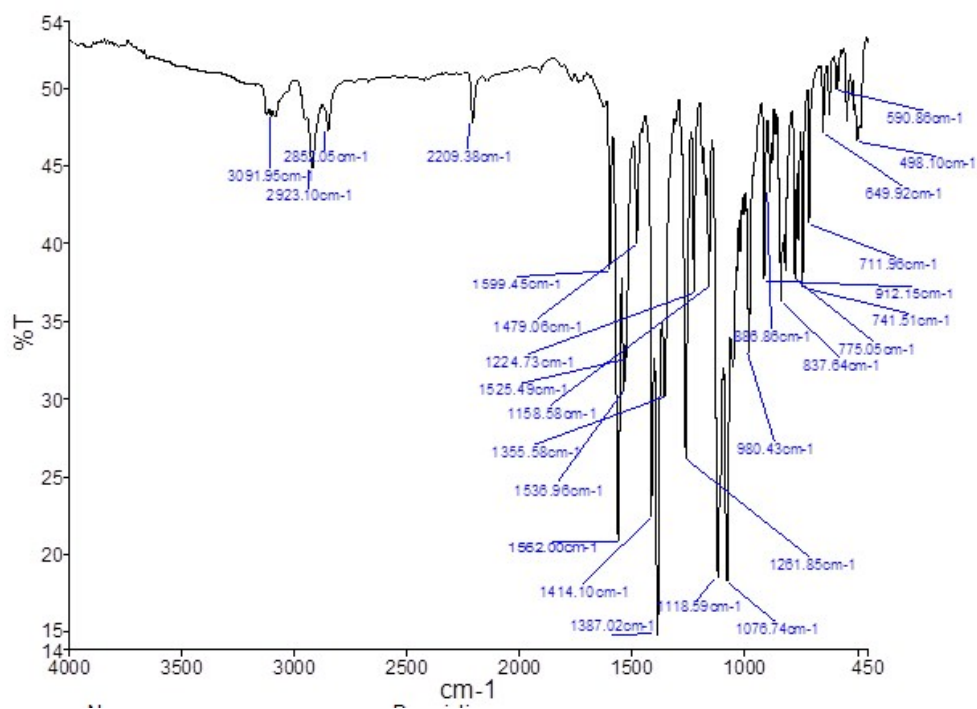

Fig. S21. FTIR spectrum of **12**.



Table S8. Crystal data and structure refinement for **8**.

|                                   |                                                                                                                     |
|-----------------------------------|---------------------------------------------------------------------------------------------------------------------|
| Identification code               | shelx                                                                                                               |
| Empirical formula                 | C <sub>28</sub> H <sub>20</sub> B <sub>2</sub> F <sub>4</sub> FeN <sub>4</sub>                                      |
| Formula weight                    | 565.95                                                                                                              |
| Temperature                       | 293(2) K                                                                                                            |
| Wavelength                        | 0.71073 Å                                                                                                           |
| Crystal system, space group       | Triclinic, P-1                                                                                                      |
| Unit cell dimensions              | a = 11.0604(7) Å   α = 65.087(8) deg. b = 11.0621(8) Å   β = 86.182(6) deg.<br>c = 11.2138(9) Å   γ = 69.916(6) deg |
| Volume                            | 1163.77(17) Å <sup>3</sup>                                                                                          |
| Z, Calculated density             | 2, 1.615 Mg/m <sup>3</sup>                                                                                          |
| Absorption coefficient            | 0.708 mm <sup>-1</sup>                                                                                              |
| F(000)                            | 576                                                                                                                 |
| Crystal size                      | 0.320 x 0.280 x 0.260 mm                                                                                            |
| Theta range for data collection   | 2.941 to 32.266 deg.                                                                                                |
| Limiting indices                  | -16 ≤ h ≤ 15, -16 ≤ k ≤ 15, -16 ≤ l ≤ 15                                                                            |
| Reflections collected / unique    | 13094 / 7502 [R (int) = 0.0484]                                                                                     |
| Completeness to theta             | 25.242   99.8 %                                                                                                     |
| Refinement method                 | Full-matrix least-squares on F <sup>2</sup>                                                                         |
| Data / restraints / parameters    | 7502 / 0 / 353                                                                                                      |
| Goodness-of-fit on F <sup>2</sup> | 1.102                                                                                                               |
| Final R indices [I > 2σ(I)]       | R1 = 0.0707, wR2 = 0.1734                                                                                           |
| R indices (all data)              | R1 = 0.1068, wR2 = 0.2177                                                                                           |
| Extinction coefficient            | 0.154(9)                                                                                                            |
| Largest diff. peak and hole       | 1.288 and -1.377 e.Å <sup>-3</sup>                                                                                  |

Table S9. Atomic coordinates ( $\times 10^4$ ) and equivalent isotropic displacement parameters ( $\text{Å}^2 \times 10^3$ ) for **8**. U (eq) is defined as one third of the trace of the orthogonalized  $U_{ij}$  tensor.

|       | X       | y        | Z        | U(eq) |
|-------|---------|----------|----------|-------|
| Fe(1) | 2447(1) | 4496(1)  | 2802(1)  | 35(1) |
| F(1)  | 1917(2) | 11819(2) | -706(2)  | 61(1) |
| F(2)  | 3446(2) | 10214(3) | 967(2)   | 63(1) |
| F(3)  | 9083(2) | 3010(2)  | 4377(2)  | 58(1) |
| F(4)  | 8767(2) | 2572(2)  | 2667(2)  | 63(1) |
| B(1)  | 2460(3) | 10399(4) | 139(4)   | 41(1) |
| B(2)  | 8169(3) | 2950(4)  | 3643(4)  | 41(1) |
| N(1)  | 1430(2) | 9836(2)  | 949(3)   | 38(1) |
| N(2)  | 2995(2) | 9497(3)  | -640(3)  | 40(1) |
| N(3)  | 7055(2) | 4395(3)  | 3032(3)  | 39(1) |
| N(4)  | 7535(2) | 1876(3)  | 4548(3)  | 40(1) |
| C(1)  | 545(3)  | 10462(3) | 1578(3)  | 41(1) |
| C(2)  | -96(3)  | 9550(3)  | 2356(3)  | 44(1) |
| C(3)  | 431(3)  | 8313(3)  | 2201(3)  | 42(1) |
| C(4)  | 1383(3) | 8482(3)  | 1296(3)  | 36(1) |
| C(5)  | 2122(3) | 7642(3)  | 667(3)   | 34(1) |
| C(6)  | 2876(3) | 8186(3)  | -347(3)  | 37(1) |
| C(7)  | 3490(3) | 7726(4)  | -1290(3) | 45(1) |
| C(8)  | 3968(4) | 8731(4)  | -2136(4) | 56(1) |
| C(9)  | 3657(4) | 9808(4)  | -1705(4) | 53(1) |
| C(10) | 7172(4) | 5621(4)  | 2170(4)  | 51(1) |
| C(11) | 5970(3) | 6704(4)  | 1787(4)  | 55(1) |
| C(12) | 5073(3) | 6109(3)  | 2438(3)  | 45(1) |
| C(13) | 5741(3) | 4658(3)  | 3225(3)  | 35(1) |
| C(14) | 5314(3) | 3551(3)  | 4061(3)  | 33(1) |
| C(15) | 6236(3) | 2179(3)  | 4769(3)  | 36(1) |
| C(16) | 6108(3) | 944(3)   | 5779(3)  | 43(1) |
| C(17) | 7314(3) | -100(4)  | 6134(4)  | 51(1) |
| C(18) | 8163(3) | 514(4)   | 5363(4)  | 49(1) |
| C(19) | 2079(3) | 6227(3)  | 987(3)   | 39(1) |
| C(20) | 983(3)  | 5781(3)  | 1318(3)  | 43(1) |
| C(21) | 1359(3) | 4355(3)  | 1472(4)  | 50(1) |
| C(22) | 2682(3) | 3891(3)  | 1270(3)  | 48(1) |
| C(23) | 3136(3) | 5033(3)  | 972(3)   | 41(1) |
| C(24) | 1780(3) | 4654(4)  | 4513(3)  | 47(1) |
| C(25) | 2037(3) | 3254(3)  | 4631(3)  | 47(1) |
| C(26) | 3367(3) | 2701(3)  | 4452(3)  | 40(1) |
| C(27) | 3946(3) | 3746(3)  | 4230(3)  | 35(1) |
| C(28) | 2930(3) | 4973(3)  | 4243(3)  | 40(1) |

Table S10. Bond lengths [Å] and angles [deg] for **8**.

|             |          |
|-------------|----------|
| Fe(1)-C(26) | 2.042(3) |
| Fe(1)-C(20) | 2.048(3) |
| Fe(1)-C(28) | 2.051(3) |
| Fe(1)-C(23) | 2.054(3) |
| Fe(1)-C(25) | 2.057(3) |
| Fe(1)-C(22) | 2.062(3) |
| Fe(1)-C(21) | 2.063(3) |
| Fe(1)-C(24) | 2.065(3) |
| Fe(1)-C(19) | 2.065(3) |
| Fe(1)-C(27) | 2.072(3) |
| F(1)-B(1)   | 1.378(4) |
| F(2)-B(1)   | 1.384(4) |
| F(3)-B(2)   | 1.381(4) |
| F(4)-B(2)   | 1.382(4) |
| B(1)-N(2)   | 1.539(4) |
| B(1)-N(1)   | 1.544(4) |
| B(2)-N(3)   | 1.543(4) |
| B(2)-N(4)   | 1.547(4) |
| N(1)-C(1)   | 1.338(4) |
| N(1)-C(4)   | 1.399(3) |
| N(2)-C(9)   | 1.339(4) |
| N(2)-C(6)   | 1.398(4) |
| N(3)-C(10)  | 1.337(4) |
| N(3)-C(13)  | 1.402(4) |
| N(4)-C(18)  | 1.339(4) |
| N(4)-C(15)  | 1.390(3) |
| C(1)-C(2)   | 1.396(4) |
| C(1)-H(1)   | 0.9300   |
| C(2)-C(3)   | 1.371(4) |
| C(2)-H(2)   | 0.9300   |
| C(3)-C(4)   | 1.416(4) |
| C(3)-H(3)   | 0.9300   |
| C(4)-C(5)   | 1.407(4) |
| C(5)-C(6)   | 1.412(4) |
| C(5)-C(19)  | 1.470(4) |
| C(6)-C(7)   | 1.399(4) |
| C(7)-C(8)   | 1.365(5) |
| C(7)-H(7)   | 0.9300   |
| C(8)-C(9)   | 1.398(5) |
| C(8)-H(8)   | 0.9300   |
| C(9)-H(9)   | 0.9300   |
| C(10)-C(11) | 1.391(5) |
| C(10)-H(10) | 0.9300   |

|                   |            |
|-------------------|------------|
| C(11)-C(12)       | 1.377(4)   |
| C(11)-H(11)       | 0.9300     |
| C(12)-C(13)       | 1.407(4)   |
| C(12)-H(12)       | 0.9300     |
| C(13)-C(14)       | 1.404(4)   |
| C(14)-C(15)       | 1.415(4)   |
| C(14)-C(27)       | 1.464(4)   |
| C(15)-C(16)       | 1.406(4)   |
| C(16)-C(17)       | 1.378(4)   |
| C(16)-H(16)       | 0.9300     |
| C(17)-C(18)       | 1.388(5)   |
| C(17)-H(17)       | 0.9300     |
| C(18)-H(18)       | 0.9300     |
| C(19)-C(20)       | 1.430(4)   |
| C(19)-C(23)       | 1.438(4)   |
| C(20)-C(21)       | 1.420(4)   |
| C(20)-H(20)       | 0.9300     |
| C(21)-C(22)       | 1.412(5)   |
| C(21)-H(21)       | 0.9300     |
| C(22)-C(23)       | 1.420(5)   |
| C(22)-H(22)       | 0.9300     |
| C(23)-H(23)       | 0.9300     |
| C(24)-C(28)       | 1.414(4)   |
| C(24)-C(25)       | 1.424(5)   |
| C(24)-H(24)       | 0.9300     |
| C(25)-C(26)       | 1.422(4)   |
| C(25)-H(25)       | 0.9300     |
| C(26)-C(27)       | 1.433(4)   |
| C(26)-H(26)       | 0.9300     |
| C(27)-C(28)       | 1.440(4)   |
| C(28)-H(28)       | 0.9300     |
| C(26)-Fe(1)-C(20) | 154.04(12) |
| C(26)-Fe(1)-C(28) | 68.37(12)  |
| C(20)-Fe(1)-C(28) | 126.06(12) |
| C(26)-Fe(1)-C(23) | 124.57(12) |
| C(20)-Fe(1)-C(23) | 68.27(13)  |
| C(28)-Fe(1)-C(23) | 124.59(12) |
| C(26)-Fe(1)-C(25) | 40.60(12)  |
| C(20)-Fe(1)-C(25) | 119.42(13) |
| C(28)-Fe(1)-C(25) | 68.28(13)  |
| C(23)-Fe(1)-C(25) | 159.45(13) |
| C(26)-Fe(1)-C(22) | 106.08(13) |
| C(20)-Fe(1)-C(22) | 68.02(13)  |
| C(28)-Fe(1)-C(22) | 158.57(14) |
| C(23)-Fe(1)-C(22) | 40.37(13)  |

|                   |            |
|-------------------|------------|
| C(25)-Fe(1)-C(22) | 121.83(14) |
| C(26)-Fe(1)-C(21) | 118.86(13) |
| C(20)-Fe(1)-C(21) | 40.42(12)  |
| C(28)-Fe(1)-C(21) | 161.02(14) |
| C(23)-Fe(1)-C(21) | 67.64(14)  |
| C(25)-Fe(1)-C(21) | 105.01(14) |
| C(22)-Fe(1)-C(21) | 40.05(14)  |
| C(26)-Fe(1)-C(24) | 67.87(13)  |
| C(20)-Fe(1)-C(24) | 107.98(13) |
| C(28)-Fe(1)-C(24) | 40.19(12)  |
| C(23)-Fe(1)-C(24) | 159.50(13) |
| C(25)-Fe(1)-C(24) | 40.42(13)  |
| C(22)-Fe(1)-C(24) | 158.77(14) |
| C(21)-Fe(1)-C(24) | 123.46(14) |
| C(26)-Fe(1)-C(19) | 162.81(12) |
| C(20)-Fe(1)-C(19) | 40.70(12)  |
| C(28)-Fe(1)-C(19) | 110.50(12) |
| C(23)-Fe(1)-C(19) | 40.86(11)  |
| C(25)-Fe(1)-C(19) | 156.25(13) |
| C(22)-Fe(1)-C(19) | 68.36(12)  |
| C(21)-Fe(1)-C(19) | 68.08(13)  |
| C(24)-Fe(1)-C(19) | 123.16(13) |
| C(26)-Fe(1)-C(27) | 40.77(11)  |
| C(20)-Fe(1)-C(27) | 163.72(12) |
| C(28)-Fe(1)-C(27) | 40.86(11)  |
| C(23)-Fe(1)-C(27) | 109.51(12) |
| C(25)-Fe(1)-C(27) | 68.59(12)  |
| C(22)-Fe(1)-C(27) | 121.51(13) |
| C(21)-Fe(1)-C(27) | 155.11(13) |
| C(24)-Fe(1)-C(27) | 68.09(12)  |
| C(19)-Fe(1)-C(27) | 127.10(11) |
| F(1)-B(1)-F(2)    | 109.5(3)   |
| F(1)-B(1)-N(2)    | 110.7(3)   |
| F(2)-B(1)-N(2)    | 109.8(3)   |
| F(1)-B(1)-N(1)    | 110.8(3)   |
| F(2)-B(1)-N(1)    | 110.6(3)   |
| N(2)-B(1)-N(1)    | 105.4(2)   |
| F(3)-B(2)-F(4)    | 108.5(3)   |
| F(3)-B(2)-N(3)    | 110.7(2)   |
| F(4)-B(2)-N(3)    | 110.6(3)   |
| F(3)-B(2)-N(4)    | 110.1(3)   |
| F(4)-B(2)-N(4)    | 111.4(3)   |
| N(3)-B(2)-N(4)    | 105.5(2)   |
| C(1)-N(1)-C(4)    | 108.1(2)   |
| C(1)-N(1)-B(1)    | 126.5(2)   |

|                   |          |
|-------------------|----------|
| C(4)-N(1)-B(1)    | 124.9(2) |
| C(9)-N(2)-C(6)    | 107.5(3) |
| C(9)-N(2)-B(1)    | 126.9(3) |
| C(6)-N(2)-B(1)    | 125.6(3) |
| C(10)-N(3)-C(13)  | 107.6(3) |
| C(10)-N(3)-B(2)   | 125.5(3) |
| C(13)-N(3)-B(2)   | 126.8(2) |
| C(18)-N(4)-C(15)  | 107.4(3) |
| C(18)-N(4)-B(2)   | 125.8(3) |
| C(15)-N(4)-B(2)   | 126.4(2) |
| N(1)-C(1)-C(2)    | 110.2(2) |
| N(1)-C(1)-H(1)    | 124.9    |
| C(2)-C(1)-H(1)    | 124.9    |
| C(3)-C(2)-C(1)    | 107.0(3) |
| C(3)-C(2)-H(2)    | 126.5    |
| C(1)-C(2)-H(2)    | 126.5    |
| C(2)-C(3)-C(4)    | 107.9(3) |
| C(2)-C(3)-H(3)    | 126.0    |
| C(4)-C(3)-H(3)    | 126.0    |
| N(1)-C(4)-C(5)    | 120.1(3) |
| N(1)-C(4)-C(3)    | 106.7(2) |
| C(5)-C(4)-C(3)    | 132.9(3) |
| C(4)-C(5)-C(6)    | 120.0(2) |
| C(4)-C(5)-C(19)   | 121.6(3) |
| C(6)-C(5)-C(19)   | 118.3(3) |
| N(2)-C(6)-C(7)    | 107.5(3) |
| N(2)-C(6)-C(5)    | 120.1(3) |
| C(7)-C(6)-C(5)    | 132.1(3) |
| C(8)-C(7)-C(6)    | 108.1(3) |
| C(8)-C(7)-H(7)    | 126.0    |
| C(6)-C(7)-H(7)    | 126.0    |
| C(7)-C(8)-C(9)    | 107.0(3) |
| C(7)-C(8)-H(8)    | 126.5    |
| C(9)-C(8)-H(8)    | 126.5    |
| N(2)-C(9)-C(8)    | 110.0(3) |
| N(2)-C(9)-H(9)    | 125.0    |
| C(8)-C(9)-H(9)    | 125.0    |
| N(3)-C(10)-C(11)  | 110.5(3) |
| N(3)-C(10)-H(10)  | 124.8    |
| C(11)-C(10)-H(10) | 124.8    |
| C(12)-C(11)-C(10) | 107.0(3) |
| C(12)-C(11)-H(11) | 126.5    |
| C(10)-C(11)-H(11) | 126.5    |
| C(11)-C(12)-C(13) | 107.6(3) |
| C(11)-C(12)-H(12) | 126.2    |

|                   |           |
|-------------------|-----------|
| C(13)-C(12)-H(12) | 126.2     |
| N(3)-C(13)-C(14)  | 120.6(2)  |
| N(3)-C(13)-C(12)  | 107.3(2)  |
| C(14)-C(13)-C(12) | 132.0(3)  |
| C(13)-C(14)-C(15) | 119.2(2)  |
| C(13)-C(14)-C(27) | 122.8(2)  |
| C(15)-C(14)-C(27) | 118.0(2)  |
| N(4)-C(15)-C(16)  | 107.6(3)  |
| N(4)-C(15)-C(14)  | 121.1(3)  |
| C(16)-C(15)-C(14) | 131.3(3)  |
| C(17)-C(16)-C(15) | 107.6(3)  |
| C(17)-C(16)-H(16) | 126.2     |
| C(15)-C(16)-H(16) | 126.2     |
| C(16)-C(17)-C(18) | 106.6(3)  |
| C(16)-C(17)-H(17) | 126.7     |
| C(18)-C(17)-H(17) | 126.7     |
| N(4)-C(18)-C(17)  | 110.7(3)  |
| N(4)-C(18)-H(18)  | 124.6     |
| C(17)-C(18)-H(18) | 124.6     |
| C(20)-C(19)-C(23) | 106.8(2)  |
| C(20)-C(19)-C(5)  | 127.3(3)  |
| C(23)-C(19)-C(5)  | 125.9(3)  |
| C(20)-C(19)-Fe(1) | 69.04(18) |
| C(23)-C(19)-Fe(1) | 69.17(17) |
| C(5)-C(19)-Fe(1)  | 128.6(2)  |
| C(21)-C(20)-C(19) | 108.3(3)  |
| C(21)-C(20)-Fe(1) | 70.34(18) |
| C(19)-C(20)-Fe(1) | 70.27(17) |
| C(21)-C(20)-H(20) | 125.8     |
| C(19)-C(20)-H(20) | 125.8     |
| Fe(1)-C(20)-H(20) | 125.1     |
| C(22)-C(21)-C(20) | 108.5(3)  |
| C(22)-C(21)-Fe(1) | 69.94(19) |
| C(20)-C(21)-Fe(1) | 69.24(18) |
| C(22)-C(21)-H(21) | 125.7     |
| C(20)-C(21)-H(21) | 125.7     |
| Fe(1)-C(21)-H(21) | 126.7     |
| C(21)-C(22)-C(23) | 108.0(3)  |
| C(21)-C(22)-Fe(1) | 70.02(19) |
| C(23)-C(22)-Fe(1) | 69.52(18) |
| C(21)-C(22)-H(22) | 126.0     |
| C(23)-C(22)-H(22) | 126.0     |
| Fe(1)-C(22)-H(22) | 126.0     |
| C(22)-C(23)-C(19) | 108.4(3)  |
| C(22)-C(23)-Fe(1) | 70.1(2)   |

|                   |           |
|-------------------|-----------|
| C(19)-C(23)-Fe(1) | 69.97(18) |
| C(22)-C(23)-H(23) | 125.8     |
| C(19)-C(23)-H(23) | 125.8     |
| Fe(1)-C(23)-H(23) | 125.7     |
| C(28)-C(24)-C(25) | 108.7(3)  |
| C(28)-C(24)-Fe(1) | 69.38(17) |
| C(25)-C(24)-Fe(1) | 69.49(19) |
| C(28)-C(24)-H(24) | 125.7     |
| C(25)-C(24)-H(24) | 125.7     |
| Fe(1)-C(24)-H(24) | 127.0     |
| C(26)-C(25)-C(24) | 107.3(3)  |
| C(26)-C(25)-Fe(1) | 69.14(17) |
| C(24)-C(25)-Fe(1) | 70.09(19) |
| C(26)-C(25)-H(25) | 126.3     |
| C(24)-C(25)-H(25) | 126.3     |
| Fe(1)-C(25)-H(25) | 126.0     |
| C(25)-C(26)-C(27) | 109.1(3)  |
| C(25)-C(26)-Fe(1) | 70.26(18) |
| C(27)-C(26)-Fe(1) | 70.76(17) |
| C(25)-C(26)-H(26) | 125.4     |
| C(27)-C(26)-H(26) | 125.4     |
| Fe(1)-C(26)-H(26) | 125.1     |
| C(26)-C(27)-C(28) | 106.4(2)  |
| C(26)-C(27)-C(14) | 125.5(3)  |
| C(28)-C(27)-C(14) | 128.2(2)  |
| C(26)-C(27)-Fe(1) | 68.47(17) |
| C(28)-C(27)-Fe(1) | 68.77(16) |
| C(14)-C(27)-Fe(1) | 128.6(2)  |
| C(24)-C(28)-C(27) | 108.5(3)  |
| C(24)-C(28)-Fe(1) | 70.42(18) |
| C(27)-C(28)-Fe(1) | 70.37(16) |
| C(24)-C(28)-H(28) | 125.8     |
| C(27)-C(28)-H(28) | 125.8     |
| Fe(1)-C(28)-H(28) | 125.0     |

Symmetry transformations used to generate equivalent atoms:



Table S11. Anisotropic displacement parameters ( $A^2 \times 10^3$ ) for **8**. The anisotropic displacement factor exponent takes the form:

$$-2 \pi^2 [h^2 a^{*2} U_{11} + \dots + 2 h k a^* b^* U_{12}]$$

|       | U11   | U22   | U33   | U23    | U13    | U12    |
|-------|-------|-------|-------|--------|--------|--------|
| Fe(1) | 29(1) | 34(1) | 46(1) | -18(1) | 6(1)   | -13(1) |
| F(1)  | 56(1) | 37(1) | 84(2) | -19(1) | 22(1)  | -21(1) |
| F(2)  | 48(1) | 95(2) | 72(2) | -52(1) | 11(1)  | -34(1) |
| F(3)  | 38(1) | 65(1) | 81(2) | -33(1) | 0(1)   | -25(1) |
| F(4)  | 64(1) | 68(1) | 75(2) | -46(1) | 37(1)  | -31(1) |
| B(1)  | 36(2) | 39(2) | 51(2) | -21(2) | 10(1)  | -17(1) |
| B(2)  | 33(2) | 46(2) | 54(2) | -27(2) | 11(1)  | -17(1) |
| N(1)  | 37(1) | 33(1) | 45(1) | -18(1) | 7(1)   | -11(1) |
| N(2)  | 38(1) | 40(1) | 44(1) | -19(1) | 9(1)   | -17(1) |
| N(3)  | 35(1) | 42(1) | 46(1) | -18(1) | 11(1)  | -22(1) |
| N(4)  | 30(1) | 42(1) | 49(2) | -20(1) | 7(1)   | -14(1) |
| C(1)  | 40(1) | 39(1) | 46(2) | -21(1) | 6(1)   | -13(1) |
| C(2)  | 38(1) | 46(2) | 49(2) | -25(1) | 11(1)  | -11(1) |
| C(3)  | 38(1) | 39(1) | 48(2) | -19(1) | 10(1)  | -15(1) |
| C(4)  | 33(1) | 32(1) | 41(2) | -15(1) | 5(1)   | -12(1) |
| C(5)  | 28(1) | 32(1) | 41(2) | -15(1) | 2(1)   | -9(1)  |
| C(6)  | 35(1) | 36(1) | 40(2) | -17(1) | 3(1)   | -12(1) |
| C(7)  | 46(2) | 49(2) | 45(2) | -24(2) | 9(1)   | -18(1) |
| C(8)  | 66(2) | 67(2) | 52(2) | -35(2) | 27(2)  | -32(2) |
| C(9)  | 59(2) | 57(2) | 52(2) | -25(2) | 21(2)  | -33(2) |
| C(10) | 50(2) | 53(2) | 56(2) | -18(2) | 12(2)  | -33(2) |
| C(11) | 52(2) | 43(2) | 64(2) | -9(2)  | 3(2)   | -28(2) |
| C(12) | 40(2) | 41(2) | 54(2) | -14(1) | 1(1)   | -19(1) |
| C(13) | 31(1) | 38(1) | 39(2) | -16(1) | 6(1)   | -18(1) |
| C(14) | 32(1) | 37(1) | 35(1) | -17(1) | 6(1)   | -17(1) |
| C(15) | 31(1) | 40(1) | 40(2) | -17(1) | 6(1)   | -14(1) |
| C(16) | 40(2) | 44(2) | 40(2) | -11(1) | 4(1)   | -19(1) |
| C(17) | 48(2) | 40(2) | 52(2) | -9(1)  | -6(2)  | -15(1) |
| C(18) | 33(1) | 46(2) | 61(2) | -19(2) | 0(1)   | -10(1) |
| C(19) | 36(1) | 36(1) | 44(2) | -18(1) | 2(1)   | -11(1) |
| C(20) | 36(1) | 37(1) | 57(2) | -19(1) | -1(1)  | -13(1) |
| C(21) | 52(2) | 43(2) | 62(2) | -24(2) | -6(2)  | -20(1) |
| C(22) | 56(2) | 37(2) | 52(2) | -23(1) | 1(2)   | -11(1) |
| C(23) | 43(2) | 38(1) | 44(2) | -21(1) | 7(1)   | -11(1) |
| C(24) | 33(1) | 54(2) | 54(2) | -26(2) | 16(1)  | -14(1) |
| C(25) | 34(1) | 50(2) | 53(2) | -15(2) | -12(1) | 22(1)  |
| C(26) | 35(1) | 35(1) | 47(2) | -14(1) | 6(1)   | -16(1) |
| C(27) | 31(1) | 38(1) | 36(1) | -13(1) | 7(1)   | -15(1) |
| C(28) | 38(1) | 42(2) | 47(2) | -25(1) | 12(1)  | -16(1) |

Table S12. Hydrogen coordinates ( $\times 10^4$ ) and isotropic displacement parameters ( $\text{Å}^2 \times 10^3$ ) for **8**.

|       | x    | y     | z     | U(eq) |
|-------|------|-------|-------|-------|
| H(1)  | 381  | 11374 | 1507  | 49    |
| H(2)  | -755 | 9744  | 2880  | 53    |
| H(3)  | 204  | 7507  | 2617  | 50    |
| H(7)  | 3560 | 6883  | -1333 | 54    |
| H(8)  | 4415 | 8704  | -2862 | 68    |
| H(9)  | 3878 | 10621 | -2100 | 63    |
| H(10) | 7947 | 5733  | 1868  | 61    |
| H(11) | 5803 | 7650  | 1202  | 65    |
| H(12) | 4186 | 6581  | 2370  | 54    |
| H(16) | 5346 | 849   | 6143  | 51    |
| H(17) | 7519 | -1034 | 6765  | 61    |
| H(18) | 9048 | 45    | 5407  | 59    |
| H(20) | 165  | 6330  | 1415  | 52    |
| H(21) | 823  | 3819  | 1673  | 60    |
| H(22) | 3170 | 2995  | 1324  | 57    |
| H(23) | 3975 | 5012  | 796   | 50    |
| H(24) | 987  | 5259  | 4598  | 56    |
| H(25) | 1446 | 2787  | 4795  | 56    |
| H(26) | 3792 | 1805  | 4475  | 47    |
| H(28) | 3015 | 5831  | 4099  | 47    |

Table S13. Torsion angles [deg] for **8**.

|      |      |      |       |          |
|------|------|------|-------|----------|
| F(1) | B(1) | N(1) | C(1)  | 46.7(4)  |
| F(2) | B(1) | N(1) | C(1)  | 74.9(4)  |
| N(2) | B(1) | N(1) | C(1)  | 166.5(3) |
| F(1) | B(1) | N(1) | C(4)  | 142.5(3) |
| F(2) | B(1) | N(1) | C(4)  | 95.9(3)  |
| N(2) | B(1) | N(1) | C(4)  | 22.7(4)  |
| F(1) | B(1) | N(2) | C(9)  | 42.1(4)  |
| F(2) | B(1) | N(2) | C(9)  | 78.9(4)  |
| N(1) | B(1) | N(2) | C(9)  | 162.0(3) |
| F(1) | B(1) | N(2) | C(6)  | 138.2(3) |
| F(2) | B(1) | N(2) | C(6)  | 100.8(3) |
| N(1) | B(1) | N(2) | C(6)  | 18.4(4)  |
| F(3) | B(2) | N(3) | C(10) | 61.9(4)  |
| F(4) | B(2) | N(3) | C(10) | 58.3(4)  |
| N(4) | B(2) | N(3) | C(10) | 179.0(3) |
| F(3) | B(2) | N(3) | C(13) | 121.3(3) |

|       |       |       |       |          |
|-------|-------|-------|-------|----------|
| F(4)  | B(2)  | N(3)  | C(13) | 118.4(3) |
| N(4)  | B(2)  | N(3)  | C(13) | 2.2(4)   |
| F(3)  | B(2)  | N(4)  | C(18) | 54.3(4)  |
| F(4)  | B(2)  | N(4)  | C(18) | 66.1(4)  |
| N(3)  | B(2)  | N(4)  | C(18) | 173.8(3) |
| F(3)  | B(2)  | N(4)  | C(15) | 118.4(3) |
| F(4)  | B(2)  | N(4)  | C(15) | 121.2(3) |
| N(3)  | B(2)  | N(4)  | C(15) | 1.1(4)   |
| C(4)  | N(1)  | C(1)  | C(2)  | 0.5(4)   |
| B(1)  | N(1)  | C(1)  | C(2)  | 171.6(3) |
| N(1)  | C(1)  | C(2)  | C(3)  | 0.5(4)   |
| C(1)  | C(2)  | C(3)  | C(4)  | 1.3(4)   |
| C(1)  | N(1)  | C(4)  | C(5)  | 173.4(3) |
| B(1)  | N(1)  | C(4)  | C(5)  | 14.4(4)  |
| C(1)  | N(1)  | C(4)  | C(3)  | 1.3(3)   |
| B(1)  | N(1)  | C(4)  | C(3)  | 170.9(3) |
| C(2)  | C(3)  | C(4)  | N(1)  | 1.6(4)   |
| C(2)  | C(3)  | C(4)  | C(5)  | 172.1(3) |
| N(1)  | C(4)  | C(5)  | C(6)  | 2.3(4)   |
| C(3)  | C(4)  | C(5)  | C(6)  | 170.8(3) |
| N(1)  | C(4)  | C(5)  | C(19) | 178.8(3) |
| C(3)  | C(4)  | C(5)  | C(19) | 5.8(5)   |
| C(9)  | N(2)  | C(6)  | C(7)  | 0.4(4)   |
| B(1)  | N(2)  | C(6)  | C(7)  | 179.9(3) |
| C(9)  | N(2)  | C(6)  | C(5)  | 174.5(3) |
| B(1)  | N(2)  | C(6)  | C(5)  | 5.7(4)   |
| C(4)  | C(5)  | C(6)  | N(2)  | 6.4(4)   |
| C(19) | C(5)  | C(6)  | N(2)  | 176.9(3) |
| C(4)  | C(5)  | C(6)  | C(7)  | 166.1(3) |
| C(19) | C(5)  | C(6)  | C(7)  | 10.6(5)  |
| N(2)  | C(6)  | C(7)  | C(8)  | 0.1(4)   |
| C(5)  | C(6)  | C(7)  | C(8)  | 173.1(3) |
| C(6)  | C(7)  | C(8)  | C(9)  | 0.6(4)   |
| C(6)  | N(2)  | C(9)  | C(8)  | 0.7(4)   |
| B(1)  | N(2)  | C(9)  | C(8)  | 179.6(3) |
| C(7)  | C(8)  | C(9)  | N(2)  | 0.8(5)   |
| C(13) | N(3)  | C(10) | C(11) | 0.6(4)   |
| B(2)  | N(3)  | C(10) | C(11) | 177.9(3) |
| N(3)  | C(10) | C(11) | C(12) | 0.6(4)   |
| C(10) | C(11) | C(12) | C(13) | 0.3(4)   |
| C(10) | N(3)  | C(13) | C(14) | 178.3(3) |
| B(2)  | N(3)  | C(13) | C(14) | 1.0(4)   |
| C(10) | N(3)  | C(13) | C(12) | 0.4(3)   |
| B(2)  | N(3)  | C(13) | C(12) | 177.7(3) |
| C(11) | C(12) | C(13) | N(3)  | 0.0(4)   |

|       |       |       |       |          |
|-------|-------|-------|-------|----------|
| C(11) | C(12) | C(13) | C(14) | 178.5(3) |
| N(3)  | C(13) | C(14) | C(15) | 3.6(4)   |
| C(12) | C(13) | C(14) | C(15) | 178.1(3) |
| N(3)  | C(13) | C(14) | C(27) | 175.9(3) |
| C(12) | C(13) | C(14) | C(27) | 2.4(5)   |
| C(18) | N(4)  | C(15) | C(16) | 1.2(3)   |
| B(2)  | N(4)  | C(15) | C(16) | 172.5(3) |
| C(18) | N(4)  | C(15) | C(14) | 179.4(3) |
| B(2)  | N(4)  | C(15) | C(14) | 5.6(4)   |
| C(13) | C(14) | C(15) | N(4)  | 6.7(4)   |
| C(27) | C(14) | C(15) | N(4)  | 172.8(3) |
| C(13) | C(14) | C(15) | C(16) | 170.9(3) |
| C(27) | C(14) | C(15) | C(16) | 9.6(5)   |
| N(4)  | C(15) | C(16) | C(17) | 1.6(4)   |
| C(14) | C(15) | C(16) | C(17) | 179.5(3) |
| C(15) | C(16) | C(17) | C(18) | 1.4(4)   |
| C(15) | N(4)  | C(18) | C(17) | 0.4(4)   |
| B(2)  | N(4)  | C(18) | C(17) | 173.4(3) |
| C(16) | C(17) | C(18) | N(4)  | 0.6(4)   |
| C(4)  | C(5)  | C(19) | C(20) | 35.7(5)  |
| C(6)  | C(5)  | C(19) | C(20) | 140.9(3) |
| C(4)  | C(5)  | C(19) | C(23) | 147.1(3) |
| C(6)  | C(5)  | C(19) | C(23) | 36.3(4)  |
| C(4)  | C(5)  | C(19) | Fe(1) | 56.2(4)  |
| C(6)  | C(5)  | C(19) | Fe(1) | 127.2(3) |
| C(23) | C(19) | C(20) | C(21) | 1.2(4)   |
| C(5)  | C(19) | C(20) | C(21) | 176.4(3) |
| Fe(1) | C(19) | C(20) | C(21) | 60.3(2)  |
| C(23) | C(19) | C(20) | Fe(1) | 59.1(2)  |
| C(5)  | C(19) | C(20) | Fe(1) | 123.2(3) |
| C(19) | C(20) | C(21) | C(22) | 1.2(4)   |
| Fe(1) | C(20) | C(21) | C(22) | 59.1(2)  |
| C(19) | C(20) | C(21) | Fe(1) | 60.3(2)  |
| C(20) | C(21) | C(22) | C(23) | 0.7(4)   |
| Fe(1) | C(21) | C(22) | C(23) | 59.4(2)  |
| C(20) | C(21) | C(22) | Fe(1) | 58.6(2)  |
| C(21) | C(22) | C(23) | C(19) | 0.0(4)   |
| Fe(1) | C(22) | C(23) | C(19) | 59.7(2)  |
| C(21) | C(22) | C(23) | Fe(1) | 59.7(2)  |
| C(20) | C(19) | C(23) | C(22) | 0.8(4)   |
| C(5)  | C(19) | C(23) | C(22) | 176.9(3) |
| Fe(1) | C(19) | C(23) | C(22) | 59.8(2)  |
| C(20) | C(19) | C(23) | Fe(1) | 59.0(2)  |
| C(5)  | C(19) | C(23) | Fe(1) | 123.3(3) |
| C(28) | C(24) | C(25) | C(26) | 0.9(4)   |

|       |       |       |       |          |
|-------|-------|-------|-------|----------|
| Fe(1) | C(24) | C(25) | C(26) | 59.4(2)  |
| C(28) | C(24) | C(25) | Fe(1) | 58.5(2)  |
| C(24) | C(25) | C(26) | C(27) | 0.4(4)   |
| Fe(1) | C(25) | C(26) | C(27) | 60.3(2)  |
| C(24) | C(25) | C(26) | Fe(1) | 60.0(2)  |
| C(25) | C(26) | C(27) | C(28) | 1.4(4)   |
| Fe(1) | C(26) | C(27) | C(28) | 58.6(2)  |
| C(25) | C(26) | C(27) | C(14) | 177.2(3) |
| Fe(1) | C(26) | C(27) | C(14) | 122.8(3) |
| C(25) | C(26) | C(27) | Fe(1) | 60.0(2)  |
| C(13) | C(14) | C(27) | C(26) | 146.0(3) |
| C(15) | C(14) | C(27) | C(26) | 33.5(4)  |
| C(13) | C(14) | C(27) | C(28) | 35.7(5)  |
| C(15) | C(14) | C(27) | C(28) | 144.8(3) |
| C(13) | C(14) | C(27) | Fe(1) | 56.5(4)  |
| C(15) | C(14) | C(27) | Fe(1) | 123.0(3) |
| C(25) | C(24) | C(28) | C(27) | 1.8(4)   |
| Fe(1) | C(24) | C(28) | C(27) | 60.3(2)  |
| C(25) | C(24) | C(28) | Fe(1) | 58.5(2)  |
| C(26) | C(27) | C(28) | C(24) | 2.0(4)   |
| C(14) | C(27) | C(28) | C(24) | 176.6(3) |
| Fe(1) | C(27) | C(28) | C(24) | 60.4(2)  |
| C(26) | C(27) | C(28) | Fe(1) | 58.4(2)  |
| C(14) | C(27) | C(28) | Fe(1) | 123.1(3) |

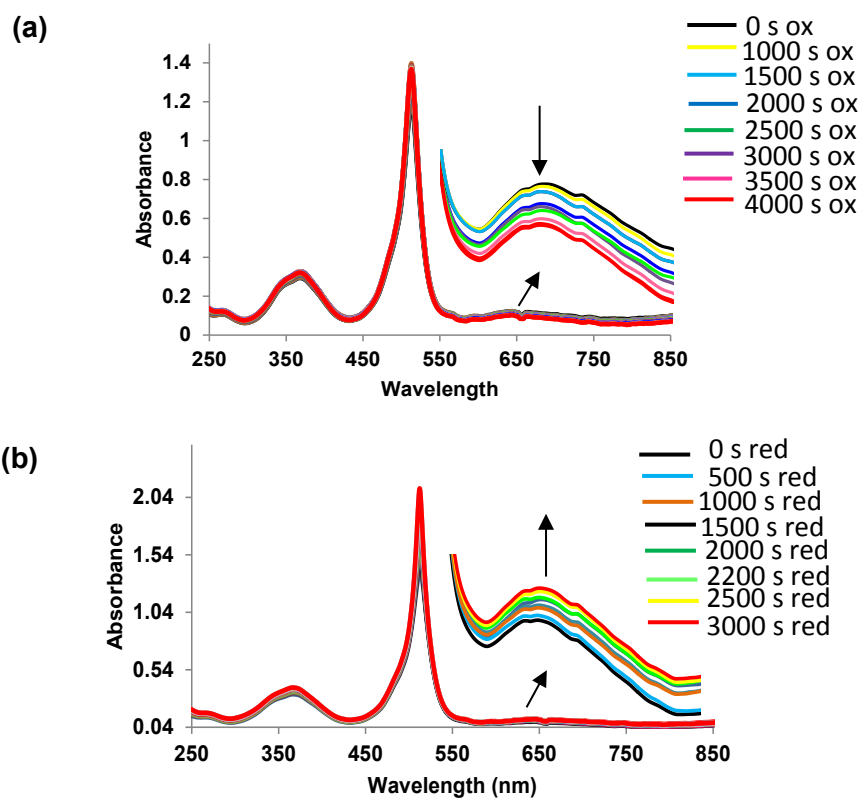

Fig. S22. Spectroelectrochemistry of **8** was performed in DCM by recording time dependent absorption changes in the UV-visible absorption spectra of **8** ( $1 \times 10^{-5}$  M) upon varying the potential: oxidation (a, 1.2 V) as well as reduction (b, 1.0 V).

Table S14. Effect of change of solvent polarity on the low energy absorption band of **7** and **8**.

| Compounds | Hexane | Toluene | THF    | DCM    | Methanol | DMF    | DMSO   |
|-----------|--------|---------|--------|--------|----------|--------|--------|
| <b>7</b>  | 646 nm | 678 nm  | 694 nm | 698 nm | 700 nm   | 710 nm | 710 nm |
| <b>8</b>  | --     | --      | 656 nm | 666 nm | 688 nm   | 690 nm | 692 nm |

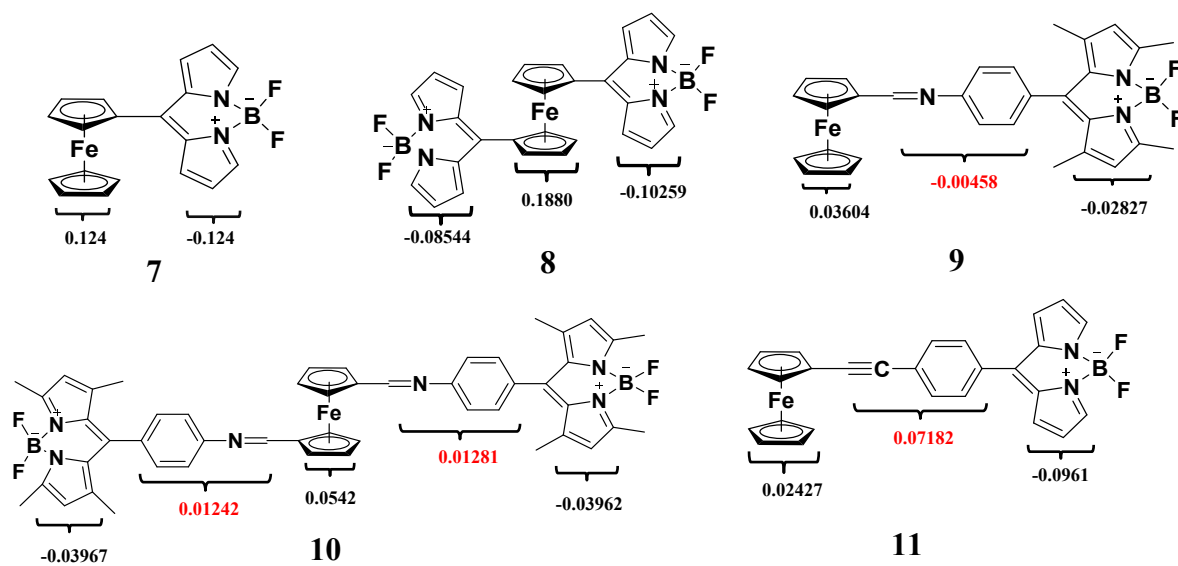

Fig. S23. The estimated Natural Bond Orbital (NBO) charge distribution.

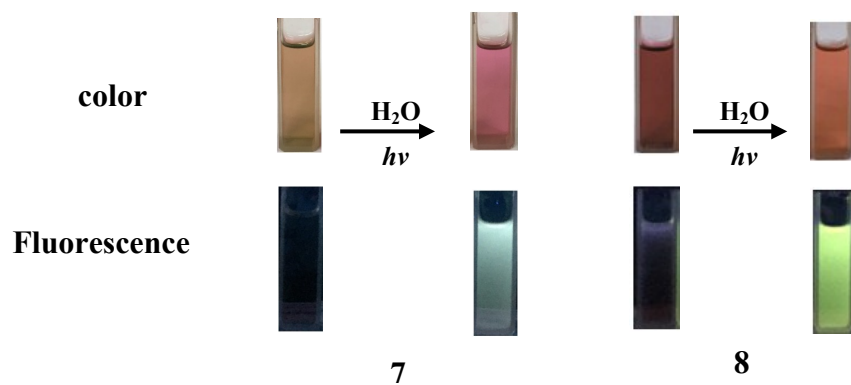

Fig. S24. Color and fluorescence changes of **7** and **8** upon reacting with water.

Complete reference 71.

Gaussian 09, Revision B.01, M. J. Frisch, G. W. Trucks, H. B. Schlegel, G. E. Scuseria, M. A. Robb, J. R. Cheeseman, G. Scalmani, V. Barone, B. Mennucci, G. A. Petersson, H. Nakatsuji, M. Caricato, X. Li, H. P. Hratchian, A. F. Izmaylov, J. Bloino, G. Zheng, J. L. Sonnenberg, M. Hada, M. Ehara, K. Toyota, R. Fukuda, J. Hasegawa, M. Ishida, T. Nakajima, Y. Honda, O. Kitao, H. Nakai, T. Vreven, J. A. Montgomery, Jr., J. E. Peralta, F. Ogliaro, M. Bearpark, J. J. Heyd, E. Brothers, K. N. Kudin, V. N. Staroverov, T. Keith, R. Kobayashi, J. Normand, K. Raghavachari, A. Rendell, J. C. Burant, S. S. Iyengar, J. Tomasi, M. Cossi, N. Rega, J. M. Millam, M. Klene, J. E. Knox, J. B. Cross, V. Bakken, C. Adamo, J. Jaramillo, R. Gomperts, R. E. Stratmann, O. Yazyev, A. J. Austin, R. Cammi, C. Pomelli, J. W. Ochterski, R. L. Martin, K. Morokuma, V. G. Zakrzewski, G. A. Voth, P. Salvador, J. J. Dannenberg, S. Dapprich, A. D. Daniels, O. Farkas, J. B. Foresman, J. V. Ortiz, J. Cioslowski, and D. J. Fox, Gaussian, Inc., Wallingford CT, 2010.
